# Supplementary material
Source: PubMed Central journal article supplement (PMC7606558)
Supplement: NIHMS1625356-supplement-1.pdf [file NIHMS1625356-supplement-1.pdf]

## Supporting Information

### Fast and Comprehensive N- and O-glycoproteomics analysis with MSFragger-Glyco

Daniel A. Polasky<sup>1</sup>, Fengchao Yu<sup>1</sup>, Guo Ci Teo<sup>1</sup>, Alexey I. Nesvizhskii<sup>\*1,2</sup>

<sup>1</sup>Department of Pathology, University of Michigan, Ann Arbor, Michigan, USA

<sup>2</sup>Department of Computational Medicine and Bioinformatics, University of Michigan, Ann Arbor, Michigan, USA

#### Table of Contents

1. **Supplementary Figure 1.** Comparison with Liu *et al.*, mouse N-glycoproteomics data processed with pGlyco 2.0
2. **Supplementary Figure 2.** Comparison of guanidinated peptide (Hex + guanidinyI group) vs HexNAc.
3. **Supplementary Figure 3.** Example spectrum of a peptide containing multiple known sites of O-glycosylation.
4. **Supplementary Table 1.** Time for MSFragger-Glyco searches of Riley *et al.* data
5. **Supplementary Table 2.** Y ions used in MSFragger searches
6. **Supplementary Table 3.** Oxonium ions used in MSFragger searches
7. **Supplementary Table 4.** Results of decoy offset search for N-glycan data
8. **Supplementary Table 5.** Results of decoy offset search for O-glycan kidney data
9. **Supplementary Table 6.** 182 N-glycan compositions searched in Riley *et al.* data.
10. **Supplementary Table 7.** 300 O-glycan compositions searched in Yang *et al.* data.
11. **Supplementary Table 8:** FDR for each mass offset for N-glycan data from Riley *et al.*
12. **Supplementary Table 9:** FDR for each mass offset for O-glycan main search (300 glycans) from Yang *et al.*

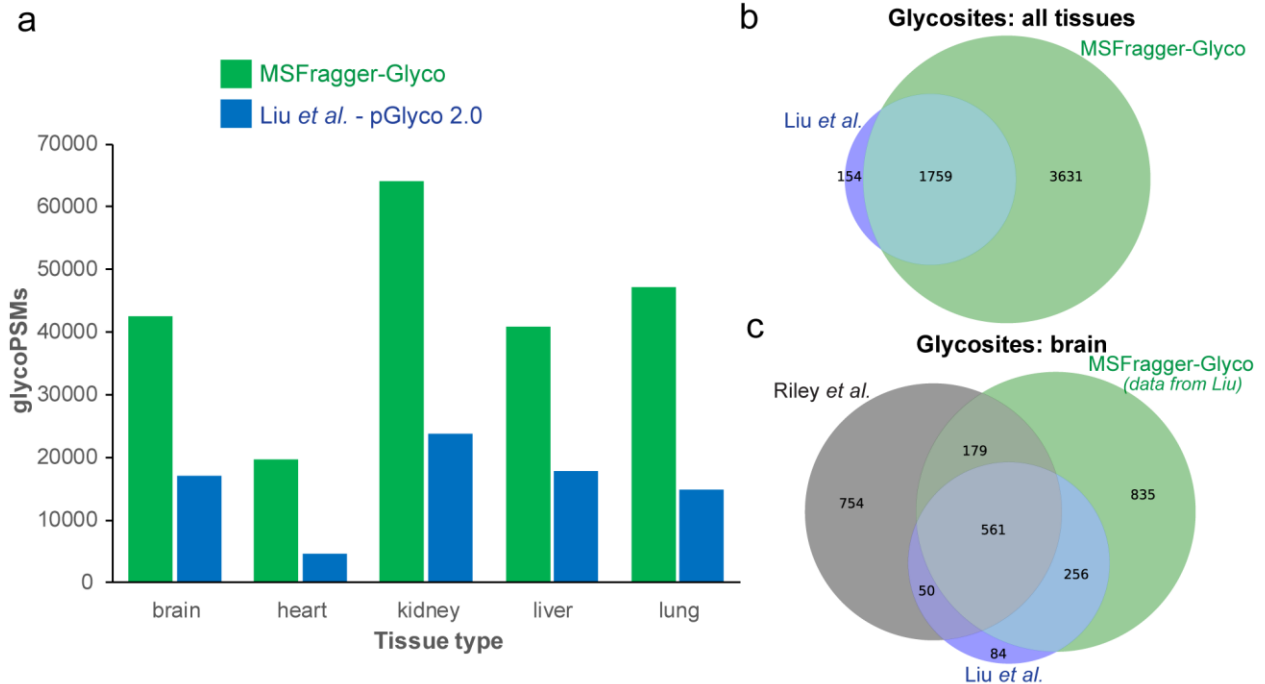

**Supplementary Figure 1.** Comparison with Liu *et al.* mouse N-glycoproteomics data processed with pGlyco 2.0. Raw data from Liu *et al.* was searched using the same glycan database (8,093 entries corresponding to 1,670 unique masses) as a mass offset glyco search in MSFragger-Glyco. a) MSFragger-Glyco annotated 2.3 to 4.2 times as many glyco PSMs as pGlyco 2.0 in the various tissue types, generating in total approx. 214,000 glycoPSMs to the 78,000 reported in Liu *et al.* b) MSFragger-Glyco identified more than twice as many glycosites (summed across all 5 tissue types) while showing excellent agreement with sites annotated in the original analysis. c) Comparison of glycosites annotated in mouse brain tissue with data of Riley *et al.*, Liu *et al.*, and MSFragger-Glyco reanalysis of Liu *et al.* data. Many of the additional sites annotated by MSFragger-Glyco appear in the Riley *et al.* data.

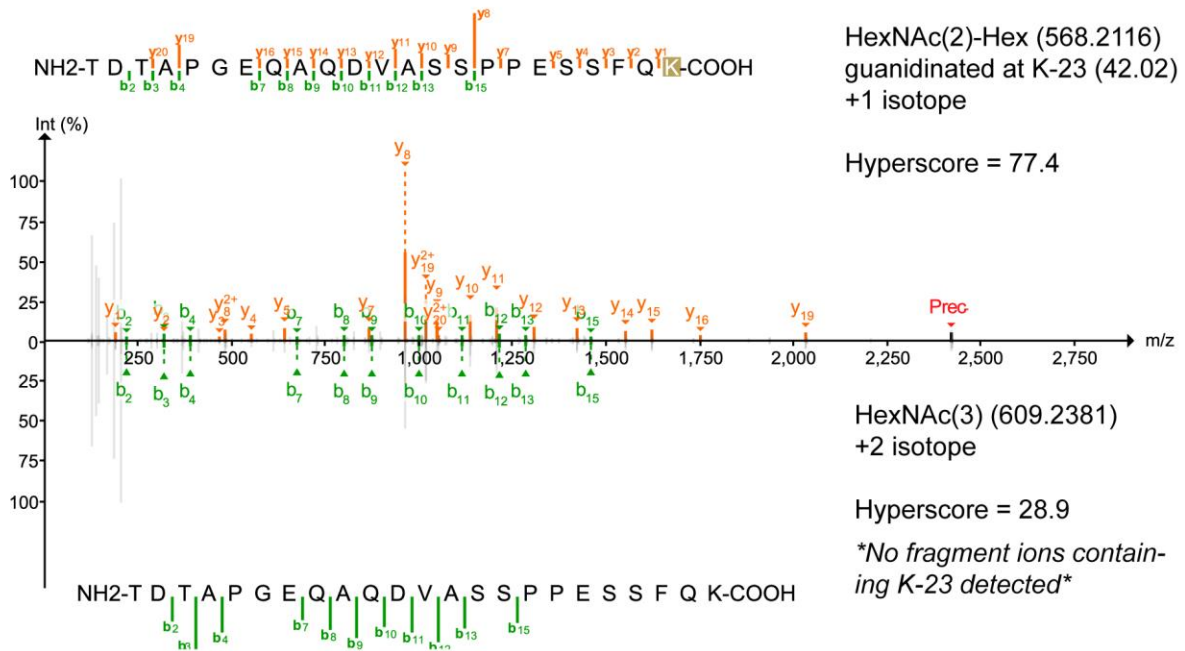

**Supplementary Figure 2.** Comparison of guanidinated peptide (Hex + guanidinyll group) vs HexNAc. The mass of HexNAc + 1 isotope is nearly identical to that of Hex + guanidinyllation of Lys. Guanidinyllation is not labile whereas O-glycosyllation is highly labile, allowing us to clearly distinguish between them based on whether fragment ions retain the guanidinyllation mass shift or not. Example peptide with guanidinyllation (top) shows clear series of y-ions resulting in a hyperscore of 77.4. Considering the same peptide with HexNAc instead of Hex+guanidinyll group matches only b-ions with a much lower score of 28.9 (bottom), indicating that all y-ions are shifted by the guanidinyll group mass and that the top spectrum contains the correct ID.

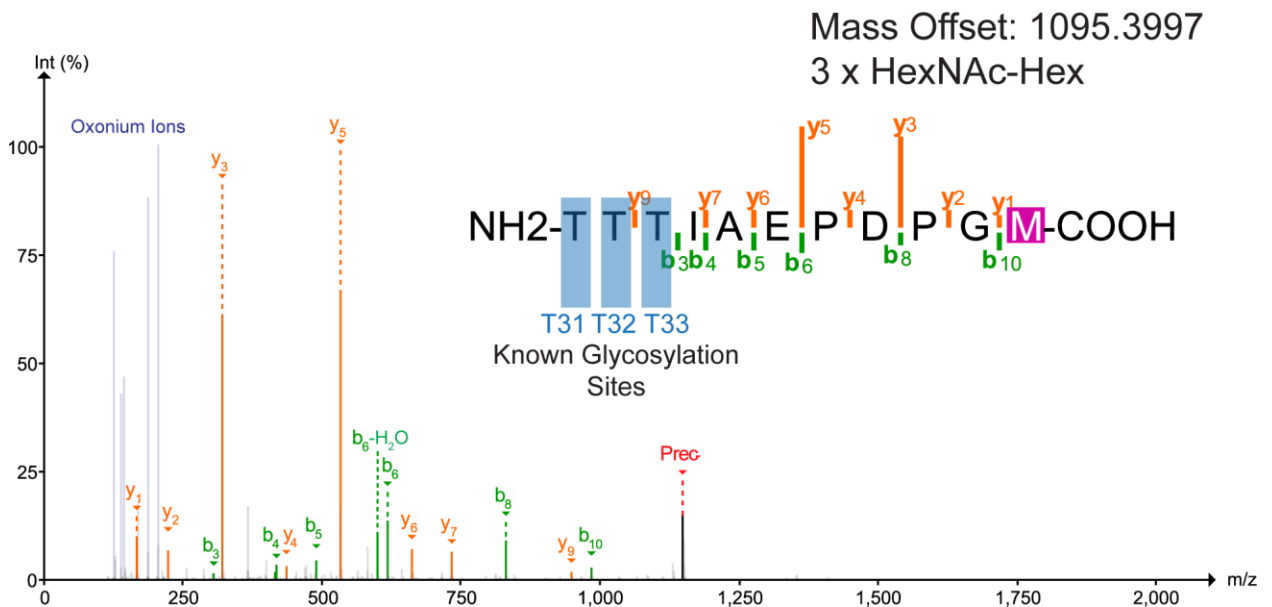

**Supplementary Figure 3.** Example spectrum of a peptide containing multiple known sites of O-glycosylation. No fragment ions bearing partial or intact glycan can be observed in the spectrum. All ions observed correspond to the fragmentation of the peptide sequence with no modifications aside from oxidation of Met-11. The mass offset of 1095.3997 corresponds to 3 copies of the common glycan HexNAcHex, which are likely present at the 3 Thr residues at the peptide N-terminus. All 3 Thr residues are known glycosylation sites of the protein (glycophorin-C).

|                 |               |                 | Time/File (min) |          |
|-----------------|---------------|-----------------|-----------------|----------|
| Activation Type | Shifted Ions? | MS2 Scans/File  | Average         | St. Dev. |
| HCD             | no            | 10,000 - 15,000 | <b>0.14</b>     | 0.001    |
| AI-ETD          | yes           | 4,000 - 5,000   | <b>1.40</b>     | 0.004    |
| Total           |               |                 | <b>1.54</b>     |          |

**Supplementary Table 1.** Time for MSFragger-Glyco searches of Riley *et al.* data. Raw files were split into HCD and AI-ETD scans and analyzed separately. Testing was performed in triplicate on a Windows 10 desktop computer with an Intel Core i7-8700 CPU (3.2 GHz, 6 cores) and 32 GB RAM. HCD scans averaged 0.14 min per raw file and AI-ETD scans averaged 1.4 min per raw file. The much larger time for AI-ETD files is a result of the shifted ion search (used for c/z-type ions with glycan intact).

**Supplementary Table 2.** Y ions used in MSFragger searches

| <b>Mass</b> | <b>Composition</b> |
|-------------|--------------------|
| 203.07937   | HexNAc(1)          |
| 406.15874   | HexNAc(2)          |
| 568.21156   | HexNAc(2)Hex(1)    |
| 730.26438   | HexNAc(2)Hex(2)    |
| 892.3172    | HexNAc(2)Hex(3)    |
| 1095.39657  | HexNAc(3)Hex(3)    |
| 1257.44939  | HexNAc(3)Hex(4)    |
| 349.137279  | HexNAc(1)Fuc(1)    |
| 552.216649  | HexNAc(2)Fuc(1)    |

**Supplementary Table 3.** Oxonium ions used in MSFragger searches

| <b>Composition</b>                             | <b>Mass (MH+)</b> |
|------------------------------------------------|-------------------|
| HexNAc(1)                                      | 204.0866          |
| HexNAc(1) - H <sub>2</sub> O                   | 186.0761          |
| HexNAc(1)Hex(1)                                | 366.1395          |
| C <sub>6</sub> H <sub>10</sub> NO <sub>3</sub> | 144.0656          |
| C <sub>7</sub> H <sub>8</sub> NO <sub>2</sub>  | 138.0550          |
| C <sub>6</sub> H <sub>8</sub> NO <sub>2</sub>  | 126.0550          |
| HexNAc(1) - H <sub>2</sub> O(2)                | 168.0655          |
| Hex(1)                                         | 163.0601          |
| NeuAc(1)                                       | 292.1027          |
| NeuAc(1) - H <sub>2</sub> O                    | 274.0921          |
| HexNAc(1)Hex(1)NeuAc(1)                        | 657.2349          |
| Phospho(1)Hex(1)                               | 243.0264          |
| Phospho(2)Hex(1)                               | 405.0792          |
| Phospho(2)Hex(2)                               | 485.0456          |
| HexNAc(1)Sulfo(1)                              | 284.0435          |
| HexNAc(1)Hex(1)Sulfo(1)                        | 446.0963          |
| HexNAc(2)Hex(2)Sulfo(1)                        | 811.2285          |
| NeuGc(1)                                       | 308.0976          |

**Supplementary Table 4.** Results of decoy offset search for N-glycan data. The 10 most abundant mass offsets were searched along with 10 decoy offsets generated by adding 20 Da to each target mass offset. 0.6% of PSMs corresponded to decoy offsets, within the expected PSM FDR of 1%.

| <b>Mass</b> | <b>Composition</b>   | <b>PSMs</b>  | <b>Decoy Mass</b>   | <b>Decoy PSMs</b> | <b>FDR%</b> |
|-------------|----------------------|--------------|---------------------|-------------------|-------------|
| 892.3172    | HexNAc-2_Hex-3       | 926          | 912.3172            | 20                | 2.2%        |
| 1038.3751   | HexNAc-2_Hex-3_Fuc-1 | 1417         | 1058.3751           | 21                | 1.5%        |
| 1054.37     | HexNAc-2_Hex-4       | 2277         | 1074.37             | 11                | 0.5%        |
| 1216.4228   | HexNAc-2_Hex-5       | 13485        | 1236.4228           | 45                | 0.3%        |
| 1378.4757   | HexNAc-2_Hex-6       | 5999         | 1398.4757           | 19                | 0.3%        |
| 1540.5285   | HexNAc-2_Hex-7       | 3846         | 1560.5285           | 8                 | 0.2%        |
| 1565.5601   | HexNAc-3_Hex-5_Fuc-1 | 392          | 1585.5601           | 9                 | 2.3%        |
| 1702.5813   | HexNAc-2_Hex-8       | 4140         | 1722.5813           | 50                | 1.2%        |
| 1768.6395   | HexNAc-4_Hex-5_Fuc-1 | 602          | 1788.6395           | 17                | 2.8%        |
| 1864.6341   | HexNAc-2_Hex-9       | 2048         | 1884.6341           | 14                | 0.7%        |
|             | <b>Target Total:</b> | <b>35132</b> | <b>Decoy Total:</b> | <b>214</b>        | <b>0.6%</b> |

**Supplementary Table 5.** Results of decoy offset search for O-glycan kidney data. The 10 most abundant mass offsets were searched along with 10 decoy offsets generated by adding 10 Da to each target mass offset. 10 Da was chosen to avoid conflicts with other known glycan composition masses and isotope distributions. In total, 1.3% of PSMs corresponded to decoy offsets, close to the expected PSM FDR of 1%. High FDRs for decoy masses 781 and 943 result from overlap with common glycans and amino acid substitutions, illustrating the challenge of choosing appropriate decoys. Despite this, the overall FDR remains close to 1% as expected.

| <b>Mass</b> | <b>Composition</b>   | <b>PSMs</b>  | <b>Decoy Mass</b>   | <b>Decoy PSMs</b> | <b>FDR%</b> |
|-------------|----------------------|--------------|---------------------|-------------------|-------------|
| 203.0794    | HexNAc-1             | 5425         | 213.0794            | 62                | 1.1%        |
| 365.1322    | HexNAc-1_Hex-1       | 45900        | 375.1322            | 201               | 0.4%        |
| 568.2116    | HexNAc-2_Hex-1       | 2783         | 578.2116            | 65                | 2.3%        |
| 730.2644    | HexNAc-2_Hex-2       | 12322        | 740.2644            | 113               | 0.9%        |
| 771.2909    | HexNAc-3_Hex-1       | 1172         | 781.2909            | 160               | 13.7%       |
| 933.3438    | HexNAc-3_Hex-2       | 964          | 943.3438            | 163               | 16.9%       |
| 1095.3966   | HexNAc-3_Hex-3       | 6379         | 1105.3966           | 113               | 1.8%        |
| 1298.4759   | HexNAc-4_Hex-3       | 441          | 1308.4759           | 23                | 5.2%        |
| 1460.5288   | HexNAc-4_Hex-4       | 1702         | 1470.5288           | 100               | 5.9%        |
| 1825.6609   | HexNAc-5_Hex-5       | 885          | 1835.6609           | 17                | 1.9%        |
|             | <b>Target Total:</b> | <b>77973</b> | <b>Decoy Total:</b> | <b>1017</b>       | <b>1.3%</b> |



**Supplementary Table 6.** 182 N-glycan compositions searched in Riley *et al.* data.

| Mass        | Composition                   | Mass        | Composition                   |
|-------------|-------------------------------|-------------|-------------------------------|
| 203.07937   | HexNAc(1)                     | 2715.962512 | HexNAc(5)Hex(6)Fuc(1)NeuAc(2) |
| 349.137279  | HexNAc(1)Fuc(1)               | 3007.057929 | HexNAc(5)Hex(6)Fuc(1)NeuAc(3) |
| 406.15874   | HexNAc(2)                     | 2279.829588 | HexNAc(5)Hex(6)Fuc(2)         |
| 552.216649  | HexNAc(2)Fuc(1)               | 2570.925005 | HexNAc(5)Hex(6)Fuc(2)NeuAc(1) |
| 568.21156   | HexNAc(2)Hex(1)               | 2425.887497 | HexNAc(5)Hex(6)Fuc(3)         |
| 714.269469  | HexNAc(2)Hex(1)Fuc(1)         | 2716.982914 | HexNAc(5)Hex(6)Fuc(3)NeuAc(1) |
| 2026.68694  | HexNAc(2)Hex(10)              | 3008.07833  | HexNAc(5)Hex(6)Fuc(3)NeuAc(2) |
| 2188.73976  | HexNAc(2)Hex(11)              | 3299.173747 | HexNAc(5)Hex(6)Fuc(3)NeuAc(3) |
| 2350.79258  | HexNAc(2)Hex(12)              | 2571.945406 | HexNAc(5)Hex(6)Fuc(4)         |
| 730.26438   | HexNAc(2)Hex(2)               | 2863.040823 | HexNAc(5)Hex(6)Fuc(4)NeuAc(1) |
| 876.322289  | HexNAc(2)Hex(2)Fuc(1)         | 2278.809187 | HexNAc(5)Hex(6)NeuAc(1)       |
| 892.3172    | HexNAc(2)Hex(3)               | 2569.904603 | HexNAc(5)Hex(6)NeuAc(2)       |
| 1038.375109 | HexNAc(2)Hex(3)Fuc(1)         | 2861.00002  | HexNAc(5)Hex(6)NeuAc(3)       |
| 1054.37002  | HexNAc(2)Hex(4)               | 2586.919916 | HexNAc(5)Hex(7)Fuc(1)NeuAc(1) |
| 1200.427929 | HexNAc(2)Hex(4)Fuc(1)         | 2878.015332 | HexNAc(5)Hex(7)Fuc(1)NeuAc(2) |
| 1216.42284  | HexNAc(2)Hex(5)               | 2311.81941  | HexNAc(5)Hex(8)               |
| 1362.480749 | HexNAc(2)Hex(5)Fuc(1)         | 2457.877319 | HexNAc(5)Hex(8)Fuc(1)         |
| 1378.47566  | HexNAc(2)Hex(6)               | 2619.930139 | HexNAc(5)Hex(9)Fuc(1)         |
| 1524.533569 | HexNAc(2)Hex(6)Fuc(1)         | 1704.63468  | HexNAc(6)Hex(3)               |
| 1458.44199  | HexNAc(2)Hex(6)Phospho(1)     | 1850.692589 | HexNAc(6)Hex(3)Fuc(1)         |
| 1540.52848  | HexNAc(2)Hex(7)               | 2141.788006 | HexNAc(6)Hex(3)Fuc(1)NeuAc(1) |
| 1686.586389 | HexNAc(2)Hex(7)Fuc(1)         | 2432.883422 | HexNAc(6)Hex(3)Fuc(1)NeuAc(2) |
| 1702.5813   | HexNAc(2)Hex(8)               | 1996.750498 | HexNAc(6)Hex(3)Fuc(2)         |
| 1864.63412  | HexNAc(2)Hex(9)               | 1866.6875   | HexNAc(6)Hex(4)               |
| 1095.39657  | HexNAc(3)Hex(3)               | 2012.745409 | HexNAc(6)Hex(4)Fuc(1)         |
| 1241.454479 | HexNAc(3)Hex(3)Fuc(1)         | 2158.803318 | HexNAc(6)Hex(4)Fuc(2)         |
| 1257.44939  | HexNAc(3)Hex(4)               | 2157.782917 | HexNAc(6)Hex(4)NeuAc(1)       |
| 1403.507299 | HexNAc(3)Hex(4)Fuc(1)         | 2028.74032  | HexNAc(6)Hex(5)               |
| 1694.602716 | HexNAc(3)Hex(4)Fuc(1)NeuAc(1) | 2174.798229 | HexNAc(6)Hex(5)Fuc(1)         |
| 1549.565208 | HexNAc(3)Hex(4)Fuc(2)         | 2465.893646 | HexNAc(6)Hex(5)Fuc(1)NeuAc(1) |
| 1840.660625 | HexNAc(3)Hex(4)Fuc(2)NeuAc(1) | 2756.989062 | HexNAc(6)Hex(5)Fuc(1)NeuAc(2) |
| 1548.544807 | HexNAc(3)Hex(4)NeuAc(1)       | 3048.084479 | HexNAc(6)Hex(5)Fuc(1)NeuAc(3) |
| 1419.50221  | HexNAc(3)Hex(5)               | 2320.856138 | HexNAc(6)Hex(5)Fuc(2)         |
| 1565.560119 | HexNAc(3)Hex(5)Fuc(1)         | 2611.951555 | HexNAc(6)Hex(5)Fuc(2)NeuAc(1) |
| 1856.655536 | HexNAc(3)Hex(5)Fuc(1)NeuAc(1) | 2466.914047 | HexNAc(6)Hex(5)Fuc(3)         |
| 2147.750952 | HexNAc(3)Hex(5)Fuc(1)NeuAc(2) | 2190.79314  | HexNAc(6)Hex(6)               |
| 1710.597627 | HexNAc(3)Hex(5)NeuAc(1)       | 2336.851049 | HexNAc(6)Hex(6)Fuc(1)         |
| 1581.55503  | HexNAc(3)Hex(6)               | 2627.946466 | HexNAc(6)Hex(6)Fuc(1)NeuAc(1) |
| 1727.612939 | HexNAc(3)Hex(6)Fuc(1)         | 2482.908958 | HexNAc(6)Hex(6)Fuc(2)         |
| 2018.708356 | HexNAc(3)Hex(6)Fuc(1)NeuAc(1) | 2774.004375 | HexNAc(6)Hex(6)Fuc(2)NeuAc(1) |
| 1872.650447 | HexNAc(3)Hex(6)NeuAc(1)       | 3065.099791 | HexNAc(6)Hex(6)Fuc(2)NeuAc(2) |
| 1298.47594  | HexNAc(4)Hex(3)               | 2481.888557 | HexNAc(6)Hex(6)NeuAc(1)       |
| 1444.533849 | HexNAc(4)Hex(3)Fuc(1)         | 2772.983973 | HexNAc(6)Hex(6)NeuAc(2)       |
| 1589.571357 | HexNAc(4)Hex(3)NeuAc(1)       | 3064.07939  | HexNAc(6)Hex(6)NeuAc(3)       |

|             |                               |             |                               |
|-------------|-------------------------------|-------------|-------------------------------|
| 1460.52876  | HexNAc(4)Hex(4)               | 2352.84596  | HexNAc(6)Hex(7)               |
| 1606.586669 | HexNAc(4)Hex(4)Fuc(1)         | 2789.999286 | HexNAc(6)Hex(7)Fuc(1)NeuAc(1) |
| 1897.682086 | HexNAc(4)Hex(4)Fuc(1)NeuAc(1) | 3081.094702 | HexNAc(6)Hex(7)Fuc(1)NeuAc(2) |
| 1752.644578 | HexNAc(4)Hex(4)Fuc(2)         | 2644.961778 | HexNAc(6)Hex(7)Fuc(2)         |
| 1751.624177 | HexNAc(4)Hex(4)NeuAc(1)       | 2936.057195 | HexNAc(6)Hex(7)Fuc(2)NeuAc(1) |
| 1622.58158  | HexNAc(4)Hex(5)               | 2791.019687 | HexNAc(6)Hex(7)Fuc(3)         |
| 1768.639489 | HexNAc(4)Hex(5)Fuc(1)         | 3082.115104 | HexNAc(6)Hex(7)Fuc(3)NeuAc(1) |
| 2059.734906 | HexNAc(4)Hex(5)Fuc(1)NeuAc(1) | 2643.941377 | HexNAc(6)Hex(7)NeuAc(1)       |
| 2350.830322 | HexNAc(4)Hex(5)Fuc(1)NeuAc(2) | 2935.036793 | HexNAc(6)Hex(7)NeuAc(2)       |
| 1914.697398 | HexNAc(4)Hex(5)Fuc(2)         | 3226.13221  | HexNAc(6)Hex(7)NeuAc(3)       |
| 2205.792815 | HexNAc(4)Hex(5)Fuc(2)NeuAc(1) | 3517.227626 | HexNAc(6)Hex(7)NeuAc(4)       |
| 2496.888231 | HexNAc(4)Hex(5)Fuc(2)NeuAc(2) | 2952.052106 | HexNAc(6)Hex(8)Fuc(1)NeuAc(1) |
| 2351.850724 | HexNAc(4)Hex(5)Fuc(3)NeuAc(1) | 2805.994197 | HexNAc(6)Hex(8)NeuAc(1)       |
| 2642.94614  | HexNAc(4)Hex(5)Fuc(3)NeuAc(2) | 2676.9516   | HexNAc(6)Hex(9)               |
| 1913.676997 | HexNAc(4)Hex(5)NeuAc(1)       | 3114.104926 | HexNAc(6)Hex(9)Fuc(1)NeuAc(1) |
| 2204.772413 | HexNAc(4)Hex(5)NeuAc(2)       | 3405.200342 | HexNAc(6)Hex(9)Fuc(1)NeuAc(2) |
| 1784.6344   | HexNAc(4)Hex(6)               | 1907.71405  | HexNAc(7)Hex(3)               |
| 1930.692309 | HexNAc(4)Hex(6)Fuc(1)         | 2053.771959 | HexNAc(7)Hex(3)Fuc(1)         |
| 2221.787726 | HexNAc(4)Hex(6)Fuc(1)NeuAc(1) | 2069.76687  | HexNAc(7)Hex(4)               |
| 2076.750218 | HexNAc(4)Hex(6)Fuc(2)         | 2215.824779 | HexNAc(7)Hex(4)Fuc(1)         |
| 2075.729817 | HexNAc(4)Hex(6)NeuAc(1)       | 2393.87251  | HexNAc(7)Hex(6)               |
| 1946.68722  | HexNAc(4)Hex(7)               | 2539.930419 | HexNAc(7)Hex(6)Fuc(1)         |
| 2092.745129 | HexNAc(4)Hex(7)Fuc(1)         | 2555.92533  | HexNAc(7)Hex(7)               |
| 2237.782637 | HexNAc(4)Hex(7)NeuAc(1)       | 2701.983239 | HexNAc(7)Hex(7)Fuc(1)         |
| 1501.55531  | HexNAc(5)Hex(3)               | 3575.269489 | HexNAc(7)Hex(7)Fuc(1)NeuAc(3) |
| 1647.613219 | HexNAc(5)Hex(3)Fuc(1)         | 2717.97815  | HexNAc(7)Hex(8)               |
| 1938.708636 | HexNAc(5)Hex(3)Fuc(1)NeuAc(1) | 2864.036059 | HexNAc(7)Hex(8)Fuc(1)         |
| 1793.671128 | HexNAc(5)Hex(3)Fuc(2)         | 3155.131476 | HexNAc(7)Hex(8)Fuc(1)NeuAc(1) |
| 1663.60813  | HexNAc(5)Hex(4)               | 4028.417725 | HexNAc(7)Hex(8)Fuc(1)NeuAc(4) |
| 1809.666039 | HexNAc(5)Hex(4)Fuc(1)         | 3009.073567 | HexNAc(7)Hex(8)NeuAc(1)       |
| 2100.761456 | HexNAc(5)Hex(4)Fuc(1)NeuAc(1) | 2110.79342  | HexNAc(8)Hex(3)               |
| 2391.856872 | HexNAc(5)Hex(4)Fuc(1)NeuAc(2) | 2256.851329 | HexNAc(8)Hex(3)Fuc(1)         |
| 1955.723948 | HexNAc(5)Hex(4)Fuc(2)         | 2272.84624  | HexNAc(8)Hex(4)               |
| 1954.703547 | HexNAc(5)Hex(4)NeuAc(1)       | 2434.89906  | HexNAc(8)Hex(5)               |
| 2245.798963 | HexNAc(5)Hex(4)NeuAc(2)       | 2580.956969 | HexNAc(8)Hex(5)Fuc(1)         |
| 1825.66095  | HexNAc(5)Hex(5)               | 2759.0047   | HexNAc(8)Hex(7)               |
| 1971.718859 | HexNAc(5)Hex(5)Fuc(1)         | 2921.05752  | HexNAc(8)Hex(8)               |
| 2262.814276 | HexNAc(5)Hex(5)Fuc(1)NeuAc(1) | 3083.11034  | HexNAc(8)Hex(9)               |
| 2553.909692 | HexNAc(5)Hex(5)Fuc(1)NeuAc(2) | 3229.168249 | HexNAc(8)Hex(9)Fuc(1)         |
| 2117.776768 | HexNAc(5)Hex(5)Fuc(2)         | 3448.24253  | HexNAc(9)Hex(10)              |
| 2408.872185 | HexNAc(5)Hex(5)Fuc(2)NeuAc(1) | 2313.87279  | HexNAc(9)Hex(3)               |
| 2263.834677 | HexNAc(5)Hex(5)Fuc(3)         | 2459.930699 | HexNAc(9)Hex(3)Fuc(1)         |
| 2116.756367 | HexNAc(5)Hex(5)NeuAc(1)       | 2475.92561  | HexNAc(9)Hex(4)               |
| 2407.851783 | HexNAc(5)Hex(5)NeuAc(2)       | 2621.983519 | HexNAc(9)Hex(4)Fuc(1)         |
| 1987.71377  | HexNAc(5)Hex(6)               | 2800.03125  | HexNAc(9)Hex(6)               |
| 2133.771679 | HexNAc(5)Hex(6)Fuc(1)         | 2946.089159 | HexNAc(9)Hex(6)Fuc(1)         |
| 2424.867096 | HexNAc(5)Hex(6)Fuc(1)NeuAc(1) | 3432.247619 | HexNAc(9)Hex(9)Fuc(1)         |

**Supplementary Table 7.** 300 O-glycan compositions searched in Yang *et al.* data.

| <b>Mass</b> | <b>Composition</b>             | <b>Mass</b> | <b>Composition</b>                   |
|-------------|--------------------------------|-------------|--------------------------------------|
| 146.0579    | Fuc(1)                         | 1387.4695   | HexNAc(5)Fuc(2)Sulf(1)               |
| 203.0794    | HexNAc(1)                      | 1387.5124   | HexNAc(3)Hex(3)Fuc(2)                |
| 226.0147    | Fuc(1)Sulf(1)                  | 1392.4120   | HexNAc(2)Hex(2)NeuAc(2)Sulf(1)       |
| 283.0362    | HexNAc(1)Sulf(1)               | 1393.4324   | HexNAc(2)Hex(2)Fuc(2)NeuAc(1)Sulf(1) |
| 308.1107    | Hex(1)Fuc(1)                   | 1395.5287   | HexNAc(4)Fuc(2)NeuAc(1)              |
| 349.1373    | HexNAc(1)Fuc(1)                | 1401.4110   | HexNAc(1)Hex(6)Fuc(1)Sulf(1)         |
| 365.1322    | HexNAc(1)Hex(1)                | 1403.5073   | HexNAc(3)Hex(4)Fuc(1)                |
| 388.0675    | Hex(1)Fuc(1)Sulf(1)            | 1419.4593   | HexNAc(5)Hex(2)Sulf(1)               |
| 406.1587    | HexNAc(2)                      | 1427.5185   | HexNAc(4)Hex(2)NeuAc(1)              |
| 429.0941    | HexNAc(1)Fuc(1)Sulf(1)         | 1428.5389   | HexNAc(4)Hex(2)Fuc(2)                |
| 445.0890    | HexNAc(1)Hex(1)Sulf(1)         | 1433.4386   | HexNAc(3)Hex(1)NeuAc(2)Sulf(1)       |
| 486.1155    | HexNAc(2)Sulf(1)               | 1434.4589   | HexNAc(3)Hex(1)Fuc(2)NeuAc(1)Sulf(1) |
| 494.1748    | HexNAc(1)NeuAc(1)              | 1442.4375   | HexNAc(2)Hex(5)Fuc(1)Sulf(1)         |
| 511.1901    | HexNAc(1)Hex(1)Fuc(1)          | 1444.5338   | HexNAc(4)Hex(3)Fuc(1)                |
| 527.1850    | HexNAc(1)Hex(2)                | 1450.4539   | HexNAc(3)Hex(2)Fuc(1)NeuAc(1)Sulf(1) |
| 568.2116    | HexNAc(2)Hex(1)                | 1451.4743   | HexNAc(3)Hex(2)Fuc(3)Sulf(1)         |
| 574.1316    | HexNAc(1)NeuAc(1)Sulf(1)       | 1458.4325   | HexNAc(2)Hex(6)Sulf(1)               |
| 591.1469    | HexNAc(1)Hex(1)Fuc(1)Sulf(1)   | 1458.5131   | HexNAc(2)Hex(2)Fuc(1)NeuAc(2)        |
| 607.1418    | HexNAc(1)Hex(2)Sulf(1)         | 1460.5288   | HexNAc(4)Hex(4)                      |
| 609.2381    | HexNAc(3)                      | 1466.4488   | HexNAc(3)Hex(3)NeuAc(1)Sulf(1)       |
| 640.2327    | HexNAc(1)Fuc(1)NeuAc(1)        | 1467.4692   | HexNAc(3)Hex(3)Fuc(2)Sulf(1)         |
| 648.1684    | HexNAc(2)Hex(1)Sulf(1)         | 1474.5080   | HexNAc(2)Hex(3)NeuAc(2)              |
| 656.2276    | HexNAc(1)Hex(1)NeuAc(1)        | 1475.4855   | HexNAc(4)Fuc(2)NeuAc(1)Sulf(1)       |
| 673.2429    | HexNAc(1)Hex(2)Fuc(1)          | 1483.4641   | HexNAc(3)Hex(4)Fuc(1)Sulf(1)         |
| 689.1949    | HexNAc(3)Sulf(1)               | 1501.5553   | HexNAc(5)Hex(3)                      |
| 689.2378    | HexNAc(1)Hex(3)                | 1507.4754   | HexNAc(4)Hex(2)NeuAc(1)Sulf(1)       |
| 697.2541    | HexNAc(2)NeuAc(1)              | 1508.4958   | HexNAc(4)Hex(2)Fuc(2)Sulf(1)         |
| 698.2746    | HexNAc(2)Fuc(2)                | 1515.5346   | HexNAc(3)Hex(2)NeuAc(2)              |
| 714.2695    | HexNAc(2)Hex(1)Fuc(1)          | 1517.5754   | HexNAc(3)Hex(2)Fuc(4)                |
| 720.1895    | HexNAc(1)Fuc(1)NeuAc(1)Sulf(1) | 1524.4906   | HexNAc(4)Hex(3)Fuc(1)Sulf(1)         |
| 730.2644    | HexNAc(2)Hex(2)                | 1524.5336   | HexNAc(2)Hex(6)Fuc(1)                |
| 736.1844    | HexNAc(1)Hex(1)NeuAc(1)Sulf(1) | 1532.5499   | HexNAc(3)Hex(3)Fuc(1)NeuAc(1)        |
| 753.1997    | HexNAc(1)Hex(2)Fuc(1)Sulf(1)   | 1533.5703   | HexNAc(3)Hex(3)Fuc(3)                |
| 755.2960    | HexNAc(3)Fuc(1)                | 1538.4699   | HexNAc(2)Hex(2)Fuc(1)NeuAc(2)Sulf(1) |
| 769.1946    | HexNAc(1)Hex(3)Sulf(1)         | 1540.4856   | HexNAc(4)Hex(4)Sulf(1)               |
| 771.2909    | HexNAc(3)Hex(1)                | 1540.5285   | HexNAc(2)Hex(7)                      |
| 777.2109    | HexNAc(2)NeuAc(1)Sulf(1)       | 1548.5448   | HexNAc(3)Hex(4)NeuAc(1)              |
| 778.2314    | HexNAc(2)Fuc(2)Sulf(1)         | 1554.4648   | HexNAc(2)Hex(3)NeuAc(2)Sulf(1)       |
| 786.2906    | HexNAc(1)Fuc(2)NeuAc(1)        | 1557.5815   | HexNAc(4)Hex(1)Fuc(2)NeuAc(1)        |
| 794.2263    | HexNAc(2)Hex(1)Fuc(1)Sulf(1)   | 1565.5601   | HexNAc(3)Hex(5)Fuc(1)                |
| 802.2855    | HexNAc(1)Hex(1)Fuc(1)NeuAc(1)  | 1573.5764   | HexNAc(4)Hex(2)Fuc(1)NeuAc(1)        |

|           |                                      |           |                                      |
|-----------|--------------------------------------|-----------|--------------------------------------|
| 810.2212  | HexNAc(2)Hex(2)Sulf(1)               | 1574.5968 | HexNAc(4)Hex(2)Fuc(3)                |
| 812.3175  | HexNAc(4)                            | 1581.5121 | HexNAc(5)Hex(3)Sulf(1)               |
| 818.2804  | HexNAc(1)Hex(2)NeuAc(1)              | 1589.5713 | HexNAc(4)Hex(3)NeuAc(1)              |
| 835.2528  | HexNAc(3)Fuc(1)Sulf(1)               | 1590.5918 | HexNAc(4)Hex(3)Fuc(2)                |
| 835.2957  | HexNAc(1)Hex(3)Fuc(1)                | 1595.4914 | HexNAc(3)Hex(2)NeuAc(2)Sulf(1)       |
| 843.3120  | HexNAc(2)Fuc(1)NeuAc(1)              | 1597.5322 | HexNAc(3)Hex(2)Fuc(4)Sulf(1)         |
| 851.2477  | HexNAc(3)Hex(1)Sulf(1)               | 1604.4904 | HexNAc(2)Hex(6)Fuc(1)Sulf(1)         |
| 851.2907  | HexNAc(1)Hex(4)                      | 1606.5867 | HexNAc(4)Hex(4)Fuc(1)                |
| 859.3070  | HexNAc(2)Hex(1)NeuAc(1)              | 1612.5067 | HexNAc(3)Hex(3)Fuc(1)NeuAc(1)Sulf(1) |
| 860.3274  | HexNAc(2)Hex(1)Fuc(2)                | 1613.5271 | HexNAc(3)Hex(3)Fuc(3)Sulf(1)         |
| 866.2474  | HexNAc(1)Fuc(2)NeuAc(1)Sulf(1)       | 1620.4853 | HexNAc(2)Hex(7)Sulf(1)               |
| 876.3223  | HexNAc(2)Hex(2)Fuc(1)                | 1622.5816 | HexNAc(4)Hex(5)                      |
| 882.2423  | HexNAc(1)Hex(1)Fuc(1)NeuAc(1)Sulf(1) | 1628.5016 | HexNAc(3)Hex(4)NeuAc(1)Sulf(1)       |
| 892.2743  | HexNAc(4)Sulf(1)                     | 1637.5383 | HexNAc(4)Hex(1)Fuc(2)NeuAc(1)Sulf(1) |
| 892.3172  | HexNAc(2)Hex(3)                      | 1645.5169 | HexNAc(3)Hex(5)Fuc(1)Sulf(1)         |
| 898.2372  | HexNAc(1)Hex(2)NeuAc(1)Sulf(1)       | 1647.6132 | HexNAc(5)Hex(3)Fuc(1)                |
| 915.2525  | HexNAc(1)Hex(3)Fuc(1)Sulf(1)         | 1653.5332 | HexNAc(4)Hex(2)Fuc(1)NeuAc(1)Sulf(1) |
| 917.3488  | HexNAc(3)Hex(1)Fuc(1)                | 1654.5536 | HexNAc(4)Hex(2)Fuc(3)Sulf(1)         |
| 923.2688  | HexNAc(2)Fuc(1)NeuAc(1)Sulf(1)       | 1663.6081 | HexNAc(5)Hex(4)                      |
| 931.2475  | HexNAc(1)Hex(4)Sulf(1)               | 1669.5281 | HexNAc(4)Hex(3)NeuAc(1)Sulf(1)       |
| 933.3438  | HexNAc(3)Hex(2)                      | 1670.5486 | HexNAc(4)Hex(3)Fuc(2)Sulf(1)         |
| 939.2638  | HexNAc(2)Hex(1)NeuAc(1)Sulf(1)       | 1677.5874 | HexNAc(3)Hex(3)NeuAc(2)              |
| 940.2842  | HexNAc(2)Hex(1)Fuc(2)Sulf(1)         | 1686.5435 | HexNAc(4)Hex(4)Fuc(1)Sulf(1)         |
| 956.2791  | HexNAc(2)Hex(2)Fuc(1)Sulf(1)         | 1686.5864 | HexNAc(2)Hex(7)Fuc(1)                |
| 972.2740  | HexNAc(2)Hex(3)Sulf(1)               | 1702.5384 | HexNAc(4)Hex(5)Sulf(1)               |
| 974.3703  | HexNAc(4)Hex(1)                      | 1704.6347 | HexNAc(6)Hex(3)                      |
| 989.3700  | HexNAc(2)Fuc(2)NeuAc(1)              | 1727.5700 | HexNAc(5)Hex(3)Fuc(1)Sulf(1)         |
| 997.3056  | HexNAc(3)Hex(1)Fuc(1)Sulf(1)         | 1727.6129 | HexNAc(3)Hex(6)Fuc(1)                |
| 997.3486  | HexNAc(1)Hex(4)Fuc(1)                | 1743.5649 | HexNAc(5)Hex(4)Sulf(1)               |
| 1005.3649 | HexNAc(2)Hex(1)Fuc(1)NeuAc(1)        | 1751.6242 | HexNAc(4)Hex(4)NeuAc(1)              |
| 1006.3853 | HexNAc(2)Hex(1)Fuc(3)                | 1752.6446 | HexNAc(4)Hex(4)Fuc(2)                |
| 1013.3006 | HexNAc(3)Hex(2)Sulf(1)               | 1757.5442 | HexNAc(3)Hex(3)NeuAc(2)Sulf(1)       |
| 1013.3435 | HexNAc(1)Hex(5)                      | 1766.5432 | HexNAc(2)Hex(7)Fuc(1)Sulf(1)         |
| 1015.3969 | HexNAc(5)                            | 1768.6395 | HexNAc(4)Hex(5)Fuc(1)                |
| 1021.3598 | HexNAc(2)Hex(2)NeuAc(1)              | 1784.5915 | HexNAc(6)Hex(3)Sulf(1)               |
| 1022.3802 | HexNAc(2)Hex(2)Fuc(2)                | 1806.6300 | HexNAc(3)Hex(2)NeuAc(3)              |
| 1038.3751 | HexNAc(2)Hex(3)Fuc(1)                | 1807.5697 | HexNAc(3)Hex(6)Fuc(1)Sulf(1)         |
| 1046.3914 | HexNAc(3)Fuc(1)NeuAc(1)              | 1823.6453 | HexNAc(3)Hex(3)Fuc(1)NeuAc(2)        |
| 1054.3271 | HexNAc(4)Hex(1)Sulf(1)               | 1825.6609 | HexNAc(5)Hex(5)                      |
| 1054.3700 | HexNAc(2)Hex(4)                      | 1831.5810 | HexNAc(4)Hex(4)NeuAc(1)Sulf(1)       |
| 1062.3863 | HexNAc(3)Hex(1)NeuAc(1)              | 1831.6239 | HexNAc(2)Hex(7)NeuAc(1)              |
| 1063.4067 | HexNAc(3)Hex(1)Fuc(2)                | 1832.6014 | HexNAc(4)Hex(4)Fuc(2)Sulf(1)         |
| 1069.3268 | HexNAc(2)Fuc(2)NeuAc(1)Sulf(1)       | 1848.5963 | HexNAc(4)Hex(5)Fuc(1)Sulf(1)         |

|           |                                      |           |                                      |
|-----------|--------------------------------------|-----------|--------------------------------------|
| 1077.3054 | HexNAc(1)Hex(4)Fuc(1)Sulf(1)         | 1850.6926 | HexNAc(6)Hex(3)Fuc(1)                |
| 1079.4017 | HexNAc(3)Hex(2)Fuc(1)                | 1864.6719 | HexNAc(4)Hex(2)Fuc(1)NeuAc(2)        |
| 1085.3217 | HexNAc(2)Hex(1)Fuc(1)NeuAc(1)Sulf(1) | 1866.6875 | HexNAc(6)Hex(4)                      |
| 1086.3421 | HexNAc(2)Hex(1)Fuc(3)Sulf(1)         | 1886.5868 | HexNAc(3)Hex(2)NeuAc(3)Sulf(1)       |
| 1093.3003 | HexNAc(1)Hex(5)Sulf(1)               | 1903.6021 | HexNAc(3)Hex(3)Fuc(1)NeuAc(2)Sulf(1) |
| 1095.3537 | HexNAc(5)Sulf(1)                     | 1905.6177 | HexNAc(5)Hex(5)Sulf(1)               |
| 1095.3966 | HexNAc(3)Hex(3)                      | 1905.6607 | HexNAc(3)Hex(8)                      |
| 1101.3166 | HexNAc(2)Hex(2)NeuAc(1)Sulf(1)       | 1911.5807 | HexNAc(2)Hex(7)NeuAc(1)Sulf(1)       |
| 1102.3370 | HexNAc(2)Hex(2)Fuc(2)Sulf(1)         | 1913.6770 | HexNAc(4)Hex(5)NeuAc(1)              |
| 1118.3319 | HexNAc(2)Hex(3)Fuc(1)Sulf(1)         | 1914.6974 | HexNAc(4)Hex(5)Fuc(2)                |
| 1126.3482 | HexNAc(3)Fuc(1)NeuAc(1)Sulf(1)       | 1930.6494 | HexNAc(6)Hex(3)Fuc(1)Sulf(1)         |
| 1134.3268 | HexNAc(2)Hex(4)Sulf(1)               | 1930.6923 | HexNAc(4)Hex(6)Fuc(1)                |
| 1136.4231 | HexNAc(4)Hex(2)                      | 1938.7086 | HexNAc(5)Hex(3)Fuc(1)NeuAc(1)        |
| 1142.3432 | HexNAc(3)Hex(1)NeuAc(1)Sulf(1)       | 1944.6287 | HexNAc(4)Hex(2)Fuc(1)NeuAc(2)Sulf(1) |
| 1143.3636 | HexNAc(3)Hex(1)Fuc(2)Sulf(1)         | 1946.6443 | HexNAc(6)Hex(4)Sulf(1)               |
| 1150.4024 | HexNAc(2)Hex(1)NeuAc(2)              | 1969.7032 | HexNAc(3)Hex(3)Fuc(2)NeuAc(2)        |
| 1151.4228 | HexNAc(2)Hex(1)Fuc(2)NeuAc(1)        | 1971.7189 | HexNAc(5)Hex(5)Fuc(1)                |
| 1159.3585 | HexNAc(3)Hex(2)Fuc(1)Sulf(1)         | 1985.6175 | HexNAc(3)Hex(8)Sulf(1)               |
| 1159.4014 | HexNAc(1)Hex(5)Fuc(1)                | 1987.7138 | HexNAc(5)Hex(6)                      |
| 1167.4177 | HexNAc(2)Hex(2)Fuc(1)NeuAc(1)        | 1993.6338 | HexNAc(4)Hex(5)NeuAc(1)Sulf(1)       |
| 1168.4381 | HexNAc(2)Hex(2)Fuc(3)                | 1994.6542 | HexNAc(4)Hex(5)Fuc(2)Sulf(1)         |
| 1175.3534 | HexNAc(3)Hex(3)Sulf(1)               | 2010.6491 | HexNAc(4)Hex(6)Fuc(1)Sulf(1)         |
| 1183.4126 | HexNAc(2)Hex(3)NeuAc(1)              | 2018.6655 | HexNAc(5)Hex(3)Fuc(1)NeuAc(1)Sulf(1) |
| 1192.4493 | HexNAc(3)Fuc(2)NeuAc(1)              | 2018.7083 | HexNAc(3)Hex(6)Fuc(1)NeuAc(1)        |
| 1200.4279 | HexNAc(2)Hex(4)Fuc(1)                | 2028.7403 | HexNAc(6)Hex(5)                      |
| 1208.4443 | HexNAc(3)Hex(1)Fuc(1)NeuAc(1)        | 2042.7196 | HexNAc(4)Hex(4)NeuAc(2)              |
| 1216.3799 | HexNAc(4)Hex(2)Sulf(1)               | 2043.7400 | HexNAc(4)Hex(4)Fuc(2)NeuAc(1)        |
| 1216.4228 | HexNAc(2)Hex(5)                      | 2049.6600 | HexNAc(3)Hex(3)Fuc(2)NeuAc(2)Sulf(1) |
| 1218.4762 | HexNAc(6)                            | 2051.6757 | HexNAc(5)Hex(5)Fuc(1)Sulf(1)         |
| 1224.4391 | HexNAc(3)Hex(2)NeuAc(1)              | 2060.7553 | HexNAc(4)Hex(5)Fuc(3)                |
| 1225.4596 | HexNAc(3)Hex(2)Fuc(2)                | 2067.6706 | HexNAc(5)Hex(6)Sulf(1)               |
| 1230.3592 | HexNAc(2)Hex(1)NeuAc(2)Sulf(1)       | 2083.7461 | HexNAc(5)Hex(3)NeuAc(2)              |
| 1231.3796 | HexNAc(2)Hex(1)Fuc(2)NeuAc(1)Sulf(1) | 2092.7451 | HexNAc(4)Hex(7)Fuc(1)                |
| 1239.3582 | HexNAc(1)Hex(5)Fuc(1)Sulf(1)         | 2098.6651 | HexNAc(3)Hex(6)Fuc(1)NeuAc(1)Sulf(1) |
| 1241.4545 | HexNAc(3)Hex(3)Fuc(1)                | 2108.6971 | HexNAc(6)Hex(5)Sulf(1)               |
| 1247.3745 | HexNAc(2)Hex(2)Fuc(1)NeuAc(1)Sulf(1) | 2117.7768 | HexNAc(5)Hex(5)Fuc(2)                |
| 1248.3949 | HexNAc(2)Hex(2)Fuc(3)Sulf(1)         | 2122.6764 | HexNAc(4)Hex(4)NeuAc(2)Sulf(1)       |
| 1257.4494 | HexNAc(3)Hex(4)                      | 2123.6968 | HexNAc(4)Hex(4)Fuc(2)NeuAc(1)Sulf(1) |
| 1263.3694 | HexNAc(2)Hex(3)NeuAc(1)Sulf(1)       | 2133.7717 | HexNAc(5)Hex(6)Fuc(1)                |
| 1272.4061 | HexNAc(3)Fuc(2)NeuAc(1)Sulf(1)       | 2140.7121 | HexNAc(4)Hex(5)Fuc(3)Sulf(1)         |
| 1280.3847 | HexNAc(2)Hex(4)Fuc(1)Sulf(1)         | 2163.7030 | HexNAc(5)Hex(3)NeuAc(2)Sulf(1)       |
| 1282.4810 | HexNAc(4)Hex(2)Fuc(1)                | 2171.7622 | HexNAc(4)Hex(3)NeuAc(3)              |
| 1288.4011 | HexNAc(3)Hex(1)Fuc(1)NeuAc(1)Sulf(1) | 2172.7019 | HexNAc(4)Hex(7)Fuc(1)Sulf(1)         |

|           |                                      |           |                                      |
|-----------|--------------------------------------|-----------|--------------------------------------|
| 1296.3796 | HexNAc(2)Hex(5)Sulf(1)               | 2174.7982 | HexNAc(6)Hex(5)Fuc(1)                |
| 1296.4603 | HexNAc(2)Hex(1)Fuc(1)NeuAc(2)        | 2189.7979 | HexNAc(4)Hex(4)Fuc(3)NeuAc(1)        |
| 1298.4330 | HexNAc(6)Sulf(1)                     | 2190.7931 | HexNAc(6)Hex(6)                      |
| 1298.4759 | HexNAc(4)Hex(3)                      | 2197.7336 | HexNAc(5)Hex(5)Fuc(2)Sulf(1)         |
| 1304.3959 | HexNAc(3)Hex(2)NeuAc(1)Sulf(1)       | 2213.7285 | HexNAc(5)Hex(6)Fuc(1)Sulf(1)         |
| 1305.4164 | HexNAc(3)Hex(2)Fuc(2)Sulf(1)         | 2213.7714 | HexNAc(3)Hex(9)Fuc(1)                |
| 1307.5127 | HexNAc(5)Fuc(2)                      | 2251.7190 | HexNAc(4)Hex(3)NeuAc(3)Sulf(1)       |
| 1312.4552 | HexNAc(2)Hex(2)NeuAc(2)              | 2254.7550 | HexNAc(6)Hex(5)Fuc(1)Sulf(1)         |
| 1313.4756 | HexNAc(2)Hex(2)Fuc(2)NeuAc(1)        | 2269.7547 | HexNAc(4)Hex(4)Fuc(3)NeuAc(1)Sulf(1) |
| 1321.4113 | HexNAc(3)Hex(3)Fuc(1)Sulf(1)         | 2270.7499 | HexNAc(6)Hex(6)Sulf(1)               |
| 1321.4542 | HexNAc(1)Hex(6)Fuc(1)                | 2293.7282 | HexNAc(3)Hex(9)Fuc(1)Sulf(1)         |
| 1337.4062 | HexNAc(3)Hex(4)Sulf(1)               | 2352.8460 | HexNAc(6)Hex(7)                      |
| 1339.5025 | HexNAc(5)Hex(2)                      | 2393.8725 | HexNAc(7)Hex(6)                      |
| 1353.4818 | HexNAc(3)Hex(1)NeuAc(2)              | 2432.8028 | HexNAc(6)Hex(7)Sulf(1)               |
| 1354.5021 | HexNAc(3)Hex(1)Fuc(2)NeuAc(1)        | 2432.8834 | HexNAc(6)Hex(3)Fuc(1)NeuAc(2)        |
| 1362.4378 | HexNAc(4)Hex(2)Fuc(1)Sulf(1)         | 2473.8293 | HexNAc(7)Hex(6)Sulf(1)               |
| 1362.4807 | HexNAc(2)Hex(5)Fuc(1)                | 2498.9039 | HexNAc(6)Hex(7)Fuc(1)                |
| 1370.4971 | HexNAc(3)Hex(2)Fuc(1)NeuAc(1)        | 2512.8402 | HexNAc(6)Hex(3)Fuc(1)NeuAc(2)Sulf(1) |
| 1371.5175 | HexNAc(3)Hex(2)Fuc(3)                | 2555.9253 | HexNAc(7)Hex(7)                      |
| 1376.4171 | HexNAc(2)Hex(1)Fuc(1)NeuAc(2)Sulf(1) | 2578.8607 | HexNAc(6)Hex(7)Fuc(1)Sulf(1)         |
| 1378.4327 | HexNAc(4)Hex(3)Sulf(1)               | 2635.8821 | HexNAc(7)Hex(7)Sulf(1)               |
| 1378.4757 | HexNAc(2)Hex(6)                      | 2701.9832 | HexNAc(7)Hex(7)Fuc(1)                |
| 1386.4920 | HexNAc(3)Hex(3)NeuAc(1)              | 2781.9400 | HexNAc(7)Hex(7)Fuc(1)Sulf(1)         |

**Supplementary Table 8.** FDR for each mass offset for N-glycan data from Riley *et al.*

| Modification Mass | Target PSMs | Decoy PSMs | FDR %      | Modification Mass | Target PSMs | Decoy PSMs | FDR %     |
|-------------------|-------------|------------|------------|-------------------|-------------|------------|-----------|
| 0                 | 54599       | 11         | <b>0</b>   | 2864              | 5           | 0          | <b>0</b>  |
| 16                | 42657       | 11         | <b>0</b>   | 2466.9            | 5           | 0          | <b>0</b>  |
| 1216.4            | 9516        | 17         | <b>0.2</b> | 1851.7            | 5           | 0          | <b>0</b>  |
| 1378.5            | 4297        | 13         | <b>0.3</b> | 1987.8            | 5           | 0          | <b>0</b>  |
| 1217.4            | 3312        | 7          | <b>0.2</b> | 2223.8            | 5           | 1          | <b>20</b> |
| 1702.6            | 2773        | 3          | <b>0.1</b> | 2217.9            | 5           | 0          | <b>0</b>  |
| 1540.5            | 2627        | 0          | <b>0</b>   | 2459.9            | 5           | 0          | <b>0</b>  |
| 1054.4            | 1810        | 9          | <b>0.5</b> | 2947.1            | 5           | 0          | <b>0</b>  |
| 1379.5            | 1466        | 2          | <b>0.1</b> | 3067.1            | 5           | 0          | <b>0</b>  |
| 1864.6            | 1310        | 0          | <b>0</b>   | 2013.7            | 5           | 0          | <b>0</b>  |
| 1703.6            | 1215        | 1          | <b>0.1</b> | 2679              | 4           | 0          | <b>0</b>  |
| 1038.4            | 1144        | 0          | <b>0</b>   | 3576.3            | 4           | 0          | <b>0</b>  |
| 1541.5            | 1081        | 2          | <b>0.2</b> | 2936              | 4           | 0          | <b>0</b>  |
| 1218.4            | 929         | 4          | <b>0.4</b> | 1526.5            | 4           | 0          | <b>0</b>  |
| 892.3             | 807         | 5          | <b>0.6</b> | 2436.9            | 4           | 0          | <b>0</b>  |
| 1865.7            | 720         | 1          | <b>0.1</b> | 1696.6            | 4           | 0          | <b>0</b>  |
| 1704.6            | 440         | 0          | <b>0</b>   | 2569.9            | 4           | 0          | <b>0</b>  |
| 1380.5            | 432         | 1          | <b>0.2</b> | 3085.1            | 4           | 0          | <b>0</b>  |
| 1055.4            | 420         | 0          | <b>0</b>   | 2281.9            | 4           | 0          | <b>0</b>  |
| 42                | 420         | 0          | <b>0</b>   | 1608.6            | 4           | 0          | <b>0</b>  |
| 1768.7            | 403         | 0          | <b>0</b>   | 2191.9            | 4           | 0          | <b>0</b>  |
| 1241.5            | 389         | 1          | <b>0.3</b> | 2407.8            | 4           | 0          | <b>0</b>  |
| -17               | 350         | 2          | <b>0.6</b> | 3432.2            | 4           | 0          | <b>0</b>  |
| 1458.5            | 339         | 1          | <b>0.3</b> | 1665.6            | 4           | 0          | <b>0</b>  |
| 1542.6            | 336         | 0          | <b>0</b>   | 2581.9            | 4           | 0          | <b>0</b>  |
| 1565.6            | 276         | 2          | <b>0.7</b> | 570.2             | 4           | 0          | <b>0</b>  |
| 1362.5            | 249         | 2          | <b>0.8</b> | 2257.8            | 4           | 0          | <b>0</b>  |
| 1419.5            | 243         | 0          | <b>0</b>   | 2238.8            | 4           | 0          | <b>0</b>  |
| 1622.6            | 241         | 0          | <b>0</b>   | 1794.7            | 4           | 0          | <b>0</b>  |
| 1727.6            | 240         | 1          | <b>0.4</b> | 2110.7            | 4           | 0          | <b>0</b>  |
| 1039.4            | 228         | 0          | <b>0</b>   | 3227.1            | 4           | 0          | <b>0</b>  |
| 730.3             | 226         | 0          | <b>0</b>   | 1916.7            | 3           | 0          | <b>0</b>  |
| 1873.7            | 212         | 0          | <b>0</b>   | 1591.5            | 3           | 0          | <b>0</b>  |
| 1866.6            | 207         | 0          | <b>0</b>   | 2030.8            | 3           | 0          | <b>0</b>  |
| 1930.7            | 192         | 1          | <b>0.5</b> | 2118.8            | 3           | 0          | <b>0</b>  |
| 2018.7            | 170         | 0          | <b>0</b>   | 2257              | 3           | 0          | <b>0</b>  |
| 1459.5            | 162         | 0          | <b>0</b>   | 2427.9            | 3           | 0          | <b>0</b>  |
| 203.1             | 153         | 0          | <b>0</b>   | 2761              | 3           | 0          | <b>0</b>  |
| 893.3             | 149         | 0          | <b>0</b>   | 1825.7            | 3           | 0          | <b>0</b>  |
| 2433.9            | 138         | 0          | <b>0</b>   | 2012.7            | 3           | 0          | <b>0</b>  |

|        |     |   |     |        |   |   |   |
|--------|-----|---|-----|--------|---|---|---|
| 1769.7 | 136 | 0 | 0   | 2541   | 3 | 0 | 0 |
| 1444.5 | 126 | 0 | 0   | 3517.3 | 3 | 0 | 0 |
| 2076.8 | 117 | 1 | 0.9 | 2192.7 | 3 | 0 | 0 |
| 1874.7 | 115 | 0 | 0   | 2149.7 | 3 | 0 | 0 |
| 1566.6 | 114 | 0 | 0   | 2612   | 3 | 0 | 0 |
| 1897.7 | 113 | 0 | 0   | 2644   | 3 | 0 | 0 |
| 1420.5 | 109 | 0 | 0   | 2141.7 | 3 | 0 | 0 |
| 1872.7 | 105 | 0 | 0   | 2094.8 | 3 | 0 | 0 |
| 2432.9 | 104 | 0 | 0   | 3229.2 | 3 | 0 | 0 |
| 1623.6 | 103 | 0 | 0   | 2613.9 | 3 | 0 | 0 |
| 1931.7 | 101 | 0 | 0   | 2410.8 | 3 | 0 | 0 |
| 2019.7 | 97  | 0 | 0   | 1811.6 | 3 | 0 | 0 |
| 568.2  | 97  | 0 | 0   | 3066   | 3 | 0 | 0 |
| 1056.4 | 88  | 0 | 0   | 1957.7 | 3 | 0 | 0 |
| 2077.8 | 84  | 0 | 0   | 1947.7 | 3 | 0 | 0 |
| 1728.6 | 81  | 0 | 0   | 715.3  | 3 | 0 | 0 |
| 1752.7 | 81  | 0 | 0   | 1097.5 | 3 | 0 | 0 |
| 1242.5 | 80  | 0 | 0   | 2245.8 | 3 | 0 | 0 |
| 1705.6 | 77  | 0 | 0   | 2800   | 3 | 0 | 0 |
| 1040.4 | 76  | 0 | 0   | 2029.7 | 3 | 0 | 0 |
| 1363.5 | 76  | 0 | 0   | 3010.1 | 3 | 0 | 0 |
| 1200.4 | 75  | 0 | 0   | 2935   | 3 | 0 | 0 |
| 1581.6 | 74  | 0 | 0   | 2190.9 | 3 | 0 | 0 |
| 2434.9 | 68  | 0 | 0   | 2807.9 | 3 | 0 | 0 |
| 1095.4 | 66  | 0 | 0   | 3300.3 | 3 | 0 | 0 |
| 1257.5 | 61  | 0 | 0   | 2111.8 | 2 | 0 | 0 |
| 1784.7 | 55  | 0 | 0   | 1988.7 | 2 | 0 | 0 |
| 1445.5 | 53  | 0 | 0   | 2553.9 | 2 | 0 | 0 |
| 1460.5 | 52  | 0 | 0   | 2147.7 | 2 | 0 | 0 |
| 406.2  | 52  | 0 | 0   | 1711.6 | 2 | 0 | 0 |
| 2758   | 52  | 0 | 0   | 2716   | 2 | 0 | 0 |
| 2027.7 | 51  | 0 | 0   | 2677   | 2 | 0 | 0 |
| 1403.5 | 50  | 0 | 0   | 1590.6 | 2 | 0 | 0 |
| 1898.7 | 48  | 0 | 0   | 1842.7 | 2 | 0 | 0 |
| 1867.7 | 47  | 0 | 0   | 2720   | 2 | 0 | 0 |
| 1770.7 | 45  | 0 | 0   | 2938   | 2 | 0 | 0 |
| 2026.7 | 44  | 0 | 0   | 2702   | 2 | 0 | 0 |
| 1606.6 | 42  | 0 | 0   | 1827.7 | 2 | 0 | 0 |
| 1932.7 | 41  | 0 | 0   | 2542   | 2 | 0 | 0 |
| 731.3  | 40  | 0 | 0   | 2258.8 | 2 | 0 | 0 |
| 2757   | 38  | 0 | 0   | 1686.6 | 2 | 0 | 0 |
| 876.3  | 38  | 0 | 0   | 3228.1 | 2 | 0 | 0 |
| 1729.6 | 37  | 0 | 0   | 349.1  | 2 | 0 | 0 |



|        |    |   |     |        |   |   |   |
|--------|----|---|-----|--------|---|---|---|
| 2020.7 | 36 | 0 | 0   | 2160.8 | 2 | 0 | 0 |
| 1582.6 | 35 | 0 | 0   | 2143.8 | 2 | 0 | 0 |
| 1201.4 | 35 | 0 | 0   | 1857.7 | 2 | 0 | 0 |
| 1421.5 | 33 | 0 | 0   | 2392.9 | 2 | 0 | 0 |
| 1753.7 | 33 | 0 | 0   | 3231.1 | 2 | 0 | 0 |
| 1624.6 | 33 | 0 | 0   | 2206.7 | 2 | 0 | 0 |
| 1785.7 | 33 | 0 | 0   | 2321.8 | 2 | 0 | 0 |
| 894.3  | 32 | 0 | 0   | 2496.9 | 2 | 0 | 0 |
| 2078.8 | 32 | 0 | 0   | 878.3  | 2 | 0 | 0 |
| 1243.5 | 31 | 0 | 0   | 3155.1 | 2 | 0 | 0 |
| 1647.6 | 30 | 0 | 0   | 552.2  | 2 | 0 | 0 |
| 1567.6 | 29 | 0 | 0   | 2354.9 | 2 | 0 | 0 |
| 204.1  | 29 | 0 | 0   | 2623.9 | 2 | 0 | 0 |
| 2435.9 | 29 | 0 | 0   | 2117.7 | 2 | 0 | 0 |
| 3082.1 | 28 | 0 | 0   | 2952   | 2 | 0 | 0 |
| 569.2  | 28 | 0 | 0   | 2801   | 2 | 0 | 0 |
| 2865.1 | 27 | 0 | 0   | 2425.9 | 2 | 0 | 0 |
| 1786.6 | 26 | 0 | 0   | 2189.7 | 2 | 0 | 0 |
| 2221.8 | 25 | 0 | 0   | 3115.1 | 2 | 0 | 0 |
| 732.3  | 25 | 0 | 0   | 2588.9 | 2 | 0 | 0 |
| 2921   | 24 | 0 | 0   | 1664.6 | 2 | 0 | 0 |
| 1549.6 | 22 | 0 | 0   | 3226.1 | 2 | 0 | 0 |
| 2759   | 22 | 0 | 0   | 2937   | 2 | 0 | 0 |
| 3083.1 | 22 | 0 | 0   | 1971.8 | 2 | 0 | 0 |
| 1364.5 | 21 | 0 | 0   | 2205.8 | 2 | 0 | 0 |
| 1648.6 | 21 | 0 | 0   | 1996.8 | 2 | 0 | 0 |
| 1259.4 | 20 | 0 | 0   | 3434.2 | 2 | 0 | 0 |
| 1298.5 | 20 | 0 | 0   | 2719   | 2 | 0 | 0 |
| 2866.1 | 20 | 0 | 0   | 1300.5 | 2 | 0 | 0 |
| 1649.6 | 19 | 0 | 0   | 2014.8 | 2 | 0 | 0 |
| 1938.7 | 18 | 0 | 0   | 1989.7 | 2 | 0 | 0 |
| 2222.8 | 18 | 0 | 0   | 2158.8 | 2 | 0 | 0 |
| 2946.1 | 18 | 0 | 0   | 2133.7 | 2 | 0 | 0 |
| 1913.7 | 18 | 0 | 0   | 2481.9 | 2 | 0 | 0 |
| 1460.4 | 17 | 0 | 0   | 1850.6 | 2 | 0 | 0 |
| 1751.6 | 17 | 0 | 0   | 2395   | 2 | 0 | 0 |
| 2351.8 | 17 | 1 | 5.9 | 2772.9 | 2 | 0 | 0 |
| 205.1  | 16 | 0 | 0   | 3114.2 | 1 | 0 | 0 |
| 1607.5 | 15 | 0 | 0   | 3065   | 1 | 0 | 0 |
| 2100.8 | 15 | 0 | 0   | 1840.6 | 1 | 0 | 0 |
| 1706.6 | 15 | 0 | 0   | 2054.7 | 1 | 0 | 0 |
| 1694.6 | 15 | 0 | 0   | 2279.8 | 1 | 0 | 0 |
| 1258.5 | 15 | 0 | 0   | 3448.3 | 1 | 0 | 0 |

|        |    |   |   |        |   |   |   |
|--------|----|---|---|--------|---|---|---|
| 1899.7 | 14 | 0 | 0 | 2313.8 | 1 | 0 | 0 |
| 2060.8 | 14 | 0 | 0 | 2393.8 | 1 | 0 | 0 |
| 2580.9 | 14 | 0 | 0 | 2702.9 | 1 | 0 | 0 |
| 1525.5 | 14 | 0 | 0 | 2135.8 | 1 | 0 | 0 |
| 1583.5 | 13 | 0 | 0 | 2776   | 1 | 0 | 0 |
| 1589.5 | 13 | 0 | 0 | 2337.9 | 1 | 0 | 0 |
| 2352.9 | 13 | 0 | 0 | 2477   | 1 | 0 | 0 |
| 1461.5 | 12 | 0 | 0 | 1972.8 | 1 | 0 | 0 |
| 2759.9 | 12 | 0 | 0 | 2467.9 | 1 | 0 | 0 |
| 2237.8 | 12 | 0 | 0 | 2424.9 | 1 | 0 | 0 |
| 2059.7 | 12 | 0 | 0 | 2247.7 | 1 | 0 | 0 |
| 1868.7 | 12 | 0 | 0 | 1300.6 | 1 | 0 | 0 |
| 1502.6 | 12 | 0 | 0 | 2571   | 1 | 0 | 0 |
| 1501.6 | 11 | 0 | 0 | 2678   | 1 | 0 | 0 |
| 1550.6 | 11 | 0 | 0 | 1548.6 | 1 | 0 | 0 |
| 1754.7 | 11 | 0 | 0 | 2426.9 | 1 | 0 | 0 |
| 1695.6 | 11 | 0 | 0 | 2791.9 | 1 | 0 | 0 |
| 3407.2 | 11 | 0 | 0 | 2557.9 | 1 | 0 | 0 |
| 1939.7 | 11 | 0 | 0 | 1998.8 | 1 | 0 | 0 |
| 1914.7 | 11 | 0 | 0 | 3156.2 | 1 | 0 | 0 |
| 1404.5 | 11 | 0 | 0 | 2555.8 | 1 | 0 | 0 |
| 1096.4 | 11 | 0 | 0 | 2322.8 | 1 | 0 | 0 |
| 2075.7 | 11 | 0 | 0 | 2336.8 | 1 | 0 | 0 |
| 1858.7 | 10 | 0 | 0 | 1694.5 | 1 | 0 | 0 |
| 1446.6 | 10 | 0 | 0 | 1826.7 | 1 | 0 | 0 |
| 2028.7 | 10 | 0 | 0 | 2704.1 | 1 | 0 | 0 |
| 2311.9 | 10 | 0 | 0 | 1462.5 | 1 | 0 | 0 |
| 2350.8 | 10 | 0 | 0 | 1909.7 | 1 | 0 | 0 |
| 1202.4 | 10 | 0 | 0 | 2642.9 | 1 | 0 | 0 |
| 1405.5 | 9  | 0 | 0 | 2070.7 | 1 | 0 | 0 |
| 1956.7 | 9  | 0 | 0 | 3433.2 | 1 | 0 | 0 |
| 1915.7 | 9  | 0 | 0 | 2408.9 | 1 | 0 | 0 |
| 2621.9 | 9  | 0 | 0 | 3519.2 | 1 | 0 | 0 |
| 1524.5 | 9  | 0 | 0 | 1809.7 | 1 | 0 | 0 |
| 877.3  | 9  | 0 | 0 | 1940.7 | 1 | 0 | 0 |
| 3084.1 | 9  | 0 | 0 | 4028.5 | 1 | 0 | 0 |
| 1503.6 | 9  | 0 | 0 | 2717.9 | 1 | 0 | 0 |
| 2093.7 | 8  | 0 | 0 | 2469   | 1 | 0 | 0 |
| 2922   | 8  | 0 | 0 | 2802   | 1 | 0 | 0 |
| 2239.8 | 8  | 0 | 0 | 2461.9 | 1 | 0 | 0 |
| 2612.9 | 8  | 0 | 0 | 3301.1 | 1 | 0 | 0 |
| 2620.9 | 8  | 0 | 0 | 2582.9 | 1 | 0 | 0 |
| 1551.6 | 7  | 0 | 0 | 2948.1 | 1 | 0 | 0 |

|        |   |   |   |        |   |   |   |
|--------|---|---|---|--------|---|---|---|
| 2879   | 7 | 0 | 0 | 1856.6 | 1 | 0 | 0 |
| 3406.2 | 7 | 0 | 0 | 3011.1 | 1 | 0 | 0 |
| 408.2  | 7 | 0 | 0 | 3008   | 1 | 0 | 0 |
| 1299.5 | 7 | 0 | 0 | 2774   | 1 | 0 | 0 |
| 2272.8 | 7 | 0 | 0 | 3299.3 | 1 | 0 | 0 |
| 1710.6 | 7 | 0 | 0 | 553.2  | 1 | 0 | 0 |
| 1793.7 | 7 | 0 | 0 | 2112.8 | 1 | 0 | 0 |
| 2273.8 | 7 | 0 | 0 | 2263.8 | 1 | 0 | 0 |
| 2458.8 | 6 | 0 | 0 | 1954.7 | 1 | 0 | 0 |
| 2457.8 | 6 | 0 | 0 | 2053.7 | 1 | 0 | 0 |
| 3081.1 | 6 | 0 | 0 | 2877.9 | 1 | 0 | 0 |
| 1097.4 | 6 | 0 | 0 | 2793   | 1 | 0 | 0 |
| 2775   | 6 | 0 | 0 | 2646   | 1 | 0 | 0 |
| 1810.7 | 6 | 0 | 0 | 3048.2 | 1 | 0 | 0 |
| 407.2  | 6 | 0 | 0 | 2587   | 1 | 0 | 0 |
| 2216.9 | 6 | 0 | 0 | 3116.1 | 1 | 0 | 0 |
| 2622.9 | 6 | 0 | 0 | 3009   | 1 | 0 | 0 |
| 1955.7 | 6 | 0 | 0 | 2483.9 | 1 | 0 | 0 |
| 714.3  | 6 | 0 | 0 | 2497.9 | 1 | 0 | 0 |
| 1852.6 | 6 | 0 | 0 | 2571.8 | 1 | 0 | 0 |
| 2207.7 | 6 | 0 | 0 | 716.3  | 1 | 0 | 0 |
| 2092.7 | 6 | 0 | 0 | 2274.9 | 1 | 0 | 0 |
| 1907.7 | 6 | 0 | 0 | 2880.1 | 1 | 0 | 0 |
| 2159.9 | 6 | 0 | 0 | 2314.9 | 1 | 0 | 0 |
| 1687.6 | 5 | 0 | 0 | 2574   | 1 | 0 | 0 |
| 1946.7 | 5 | 0 | 0 | 4029.5 | 1 | 0 | 0 |
| 2069.9 | 5 | 0 | 0 | 2278.7 | 1 | 0 | 0 |
| 2353.8 | 5 | 0 | 0 | 3230.2 | 1 | 0 | 0 |
| 2482.9 | 5 | 0 | 0 | 2175.8 | 1 | 0 | 0 |
| 2061.7 | 5 | 0 | 0 | 3050.1 | 1 | 0 | 0 |
| 2312.8 | 5 | 0 | 0 | 2391.9 | 1 | 0 | 0 |
| 1712.6 | 5 | 0 | 0 | 3405.2 | 1 | 0 | 0 |
| 2465.9 | 5 | 0 | 0 | 554.2  | 1 | 0 | 0 |
| 2619.9 | 5 | 0 | 0 | 2116.8 | 1 | 0 | 0 |
| 1663.6 | 5 | 0 | 0 |        |   |   |   |

**Supplementary Table 9:** FDR for each mass offset for O-glycan main search (300 glycans) from Yang *et al.*

| Modification Mass | Target PSMs | Decoy PSMs | FDR %      | Modification Mass | Target PSMs | Decoy PSMs | FDR %       |
|-------------------|-------------|------------|------------|-------------------|-------------|------------|-------------|
| 365.1             | 45598       | 57         | <b>0.1</b> | 844.3             | 29          | 0          | <b>0</b>    |
| 42                | 30878       | 24         | <b>0.1</b> | 1232.4            | 29          | 0          | <b>0</b>    |
| 1                 | 22065       | 369        | <b>1.7</b> | 1629.5            | 29          | 0          | <b>0</b>    |
| 16                | 16131       | 209        | <b>1.3</b> | 2637.9            | 29          | 0          | <b>0</b>    |
| 730.3             | 13015       | 2          | <b>0</b>   | 940.3             | 28          | 0          | <b>0</b>    |
| 57                | 12664       | 24         | <b>0.2</b> | 1258.5            | 28          | 0          | <b>0</b>    |
| 366.1             | 8949        | 12         | <b>0.1</b> | 488.2             | 28          | 0          | <b>0</b>    |
| 0                 | 5808        | 0          | <b>0</b>   | 1216.4            | 28          | 0          | <b>0</b>    |
| 203.1             | 5517        | 2          | <b>0</b>   | 227               | 28          | 0          | <b>0</b>    |
| 1095.4            | 5224        | 7          | <b>0.1</b> | 836.3             | 27          | 11         | <b>40.7</b> |
| 367.1             | 4536        | 3          | <b>0.1</b> | 1192.5            | 27          | 0          | <b>0</b>    |
| 731.3             | 3254        | 0          | <b>0</b>   | 1554.5            | 27          | 0          | <b>0</b>    |
| 1096.4            | 2670        | 0          | <b>0</b>   | 794.2             | 27          | 0          | <b>0</b>    |
| 568.2             | 2508        | 8          | <b>0.3</b> | 1392.3            | 27          | 2          | <b>7.4</b>  |
| 933.3             | 1431        | 1          | <b>0.1</b> | 1656.6            | 27          | 0          | <b>0</b>    |
| 1461.5            | 1410        | 24         | <b>1.7</b> | 2053.6            | 27          | 0          | <b>0</b>    |
| 445.1             | 1169        | 0          | <b>0</b>   | 1120.4            | 27          | 0          | <b>0</b>    |
| 732.3             | 1043        | 0          | <b>0</b>   | 1048.4            | 26          | 0          | <b>0</b>    |
| 1460.5            | 1013        | 39         | <b>3.8</b> | 737.1             | 26          | 0          | <b>0</b>    |
| 771.3             | 854         | 3          | <b>0.4</b> | 1217.4            | 26          | 0          | <b>0</b>    |
| 810.2             | 847         | 2          | <b>0.2</b> | 1274.4            | 26          | 0          | <b>0</b>    |
| 1097.4            | 807         | 0          | <b>0</b>   | 753.2             | 26          | 1          | <b>3.8</b>  |
| 569.2             | 765         | 0          | <b>0</b>   | 2018.8            | 26          | 0          | <b>0</b>    |
| 2135.8            | 738         | 0          | <b>0</b>   | 852.3             | 25          | 0          | <b>0</b>    |
| 1462.5            | 732         | 4          | <b>0.5</b> | 722.2             | 25          | 0          | <b>0</b>    |
| 1826.7            | 723         | 15         | <b>2.1</b> | 721.2             | 25          | 0          | <b>0</b>    |
| 1136.4            | 700         | 7          | <b>1</b>   | 972.3             | 25          | 0          | <b>0</b>    |
| 1827.7            | 677         | 2          | <b>0.3</b> | 1322.5            | 25          | 1          | <b>4</b>    |
| 204.1             | 642         | 0          | <b>0</b>   | 866.2             | 25          | 0          | <b>0</b>    |
| 934.3             | 637         | 0          | <b>0</b>   | 1645.5            | 25          | 0          | <b>0</b>    |
| 406.2             | 570         | 0          | <b>0</b>   | 1289.5            | 25          | 0          | <b>0</b>    |
| 1298.4            | 557         | 24         | <b>4.3</b> | 228               | 25          | 0          | <b>0</b>    |
| 2500.9            | 539         | 0          | <b>0</b>   | 1823.6            | 25          | 0          | <b>0</b>    |
| 1299.5            | 524         | 9          | <b>1.7</b> | 1323.5            | 25          | 0          | <b>0</b>    |
| 1175.4            | 499         | 0          | <b>0</b>   | 2556              | 25          | 0          | <b>0</b>    |
| 2134.8            | 469         | 0          | <b>0</b>   | 1628.5            | 25          | 0          | <b>0</b>    |
| 408.1             | 449         | 0          | <b>0</b>   | 1574.6            | 24          | 0          | <b>0</b>    |
| 570.2             | 433         | 0          | <b>0</b>   | 1080.4            | 24          | 0          | <b>0</b>    |
| 1137.4            | 432         | 1          | <b>0.2</b> | 1459.5            | 24          | 0          | <b>0</b>    |

|        |     |    |            |        |    |   |            |
|--------|-----|----|------------|--------|----|---|------------|
| 690.2  | 373 | 0  | <b>0</b>   | 1085.3 | 24 | 0 | <b>0</b>   |
| 446.1  | 351 | 0  | <b>0</b>   | 1160.4 | 24 | 0 | <b>0</b>   |
| 1176.4 | 351 | 0  | <b>0</b>   | 1444.5 | 24 | 0 | <b>0</b>   |
| 859.3  | 330 | 0  | <b>0</b>   | 1850.6 | 24 | 0 | <b>0</b>   |
| 772.3  | 325 | 1  | <b>0.3</b> | 1308.5 | 23 | 0 | <b>0</b>   |
| 308.1  | 320 | 0  | <b>0</b>   | 1831.7 | 23 | 0 | <b>0</b>   |
| 2192.8 | 318 | 0  | <b>0</b>   | 1848.5 | 23 | 0 | <b>0</b>   |
| 811.2  | 305 | 0  | <b>0</b>   | 1354.5 | 23 | 0 | <b>0</b>   |
| 1502.6 | 305 | 4  | <b>1.3</b> | 1297.5 | 23 | 0 | <b>0</b>   |
| 689.2  | 292 | 0  | <b>0</b>   | 1248.4 | 23 | 0 | <b>0</b>   |
| 1989.7 | 286 | 0  | <b>0</b>   | 2395.9 | 23 | 0 | <b>0</b>   |
| 205.1  | 285 | 0  | <b>0</b>   | 2092.7 | 23 | 0 | <b>0</b>   |
| 1300.5 | 281 | 2  | <b>0.7</b> | 2393.9 | 23 | 0 | <b>0</b>   |
| 494.2  | 280 | 0  | <b>0</b>   | 1757.5 | 23 | 0 | <b>0</b>   |
| 511.2  | 276 | 1  | <b>0.4</b> | 700.3  | 23 | 0 | <b>0</b>   |
| 2558   | 276 | 0  | <b>0</b>   | 1524.5 | 23 | 0 | <b>0</b>   |
| 1664.6 | 274 | 11 | <b>4</b>   | 1948.7 | 22 | 0 | <b>0</b>   |
| 1241.5 | 273 | 2  | <b>0.7</b> | 1851.7 | 22 | 0 | <b>0</b>   |
| 1501.6 | 270 | 7  | <b>2.6</b> | 1183.4 | 22 | 0 | <b>0</b>   |
| 812.2  | 245 | 0  | <b>0</b>   | 1209.4 | 22 | 0 | <b>0</b>   |
| 1825.7 | 239 | 2  | <b>0.8</b> | 1364.5 | 22 | 0 | <b>0</b>   |
| 935.4  | 235 | 0  | <b>0</b>   | 973.3  | 22 | 0 | <b>0</b>   |
| 876.3  | 230 | 0  | <b>0</b>   | 1559.6 | 22 | 0 | <b>0</b>   |
| 2215.8 | 229 | 0  | <b>0</b>   | 1419.5 | 21 | 0 | <b>0</b>   |
| 1988.7 | 222 | 0  | <b>0</b>   | 1679.6 | 21 | 0 | <b>0</b>   |
| 1242.5 | 221 | 0  | <b>0</b>   | 1401.4 | 21 | 1 | <b>4.8</b> |
| 1138.5 | 216 | 0  | <b>0</b>   | 1312.4 | 21 | 0 | <b>0</b>   |
| 974.4  | 216 | 0  | <b>0</b>   | 2294.7 | 21 | 0 | <b>0</b>   |
| 1606.6 | 206 | 0  | <b>0</b>   | 1646.6 | 21 | 1 | <b>4.8</b> |
| 2354.9 | 201 | 0  | <b>0</b>   | 1686.6 | 21 | 0 | <b>0</b>   |
| 2499.9 | 199 | 0  | <b>0</b>   | 1807.6 | 21 | 0 | <b>0</b>   |
| 1224.4 | 196 | 0  | <b>0</b>   | 2172.7 | 21 | 0 | <b>0</b>   |
| 2191.8 | 193 | 0  | <b>0</b>   | 591.2  | 21 | 0 | <b>0</b>   |
| 1607.6 | 189 | 0  | <b>0</b>   | 1903.6 | 21 | 0 | <b>0</b>   |
| 860.3  | 187 | 0  | <b>0</b>   | 1687.5 | 21 | 0 | <b>0</b>   |
| 349.1  | 187 | 0  | <b>0</b>   | 2702   | 21 | 0 | <b>0</b>   |
| 1663.6 | 185 | 3  | <b>1.6</b> | 1087.4 | 20 | 1 | <b>5</b>   |
| 1665.6 | 180 | 2  | <b>1.1</b> | 574.1  | 20 | 0 | <b>0</b>   |
| 1541.5 | 177 | 0  | <b>0</b>   | 608.2  | 20 | 0 | <b>0</b>   |
| 1340.5 | 172 | 0  | <b>0</b>   | 1007.4 | 20 | 0 | <b>0</b>   |
| 1503.5 | 171 | 1  | <b>0.6</b> | 1008.4 | 20 | 0 | <b>0</b>   |
| 1339.5 | 171 | 0  | <b>0</b>   | 1655.6 | 20 | 0 | <b>0</b>   |
| 2704   | 170 | 0  | <b>0</b>   | 1930.7 | 19 | 1 | <b>5.3</b> |

|        |     |   |     |        |    |   |      |
|--------|-----|---|-----|--------|----|---|------|
| 656.2  | 163 | 0 | 0   | 1313.5 | 19 | 0 | 0    |
| 773.3  | 160 | 0 | 0   | 1575.6 | 19 | 0 | 0    |
| 609.3  | 158 | 0 | 0   | 1428.5 | 19 | 0 | 0    |
| 1079.3 | 153 | 0 | 0   | 916.3  | 19 | 0 | 0    |
| 755.3  | 153 | 0 | 0   | 1102.3 | 19 | 0 | 0    |
| 769.2  | 153 | 0 | 0   | 1373.5 | 19 | 0 | 0    |
| 2133.8 | 149 | 0 | 0   | 1395.5 | 19 | 0 | 0    |
| 611.3  | 148 | 0 | 0   | 720.2  | 19 | 0 | 0    |
| 407.2  | 147 | 0 | 0   | 1688.5 | 19 | 0 | 0    |
| 714.3  | 145 | 0 | 0   | 915.3  | 19 | 0 | 0    |
| 429.1  | 144 | 0 | 0   | 1994.6 | 19 | 0 | 0    |
| 1177.4 | 139 | 0 | 0   | 1538.4 | 19 | 0 | 0    |
| 803.3  | 135 | 0 | 0   | 1483.4 | 19 | 0 | 0    |
| 447.1  | 134 | 0 | 0   | 1887.6 | 19 | 0 | 0    |
| 512.2  | 133 | 0 | 0   | 1421.5 | 19 | 0 | 0    |
| 716.3  | 131 | 0 | 0   | 1443.5 | 18 | 0 | 0    |
| 2353.9 | 130 | 0 | 0   | 837.3  | 18 | 0 | 0    |
| 845.3  | 130 | 0 | 0   | 2256.8 | 18 | 0 | 0    |
| 877.4  | 130 | 0 | 0   | 2085.8 | 18 | 0 | 0    |
| 1623.6 | 129 | 0 | 0   | 1377.4 | 18 | 1 | 5.6  |
| 691.3  | 127 | 0 | 0   | 819.3  | 18 | 0 | 0    |
| 1540.5 | 126 | 0 | 0   | 1231.4 | 18 | 1 | 5.6  |
| 495.1  | 123 | 0 | 0   | 1280.4 | 18 | 0 | 0    |
| 642.2  | 122 | 0 | 0   | 2578.9 | 18 | 0 | 0    |
| 527.2  | 118 | 3 | 2.5 | 1508.5 | 18 | 0 | 0    |
| 1973.7 | 118 | 0 | 0   | 1702.5 | 18 | 0 | 0    |
| 1134.3 | 118 | 0 | 0   | 1403.4 | 18 | 2 | 11.1 |
| 2176.8 | 117 | 0 | 0   | 957.2  | 18 | 0 | 0    |
| 513.2  | 115 | 1 | 0.9 | 1389.5 | 18 | 0 | 0    |
| 786.3  | 115 | 0 | 0   | 1088.3 | 18 | 0 | 0    |
| 1907.6 | 114 | 0 | 0   | 2171.7 | 18 | 0 | 0    |
| 1055.4 | 114 | 0 | 0   | 736.1  | 17 | 0 | 0    |
| 975.4  | 113 | 0 | 0   | 1047.4 | 17 | 0 | 0    |
| 389.1  | 113 | 0 | 0   | 1556.5 | 17 | 0 | 0    |
| 715.2  | 112 | 0 | 0   | 1220.5 | 17 | 0 | 0    |
| 1152.4 | 111 | 1 | 0.9 | 1219.5 | 17 | 0 | 0    |
| 2580.9 | 111 | 0 | 0   | 2174.7 | 17 | 0 | 0    |
| 648.2  | 110 | 4 | 3.6 | 1233.4 | 17 | 0 | 0    |
| 147.1  | 110 | 0 | 0   | 1996.6 | 17 | 0 | 0    |
| 1153.4 | 110 | 0 | 0   | 1094.3 | 17 | 0 | 0    |
| 1769.6 | 109 | 0 | 0   | 1806.6 | 17 | 0 | 0    |
| 1542.5 | 109 | 0 | 0   | 1307.3 | 17 | 0 | 0    |
| 2214.8 | 108 | 0 | 0   | 1284.5 | 17 | 0 | 0    |

|        |     |   |            |        |    |   |            |
|--------|-----|---|------------|--------|----|---|------------|
| 351.1  | 108 | 0 | <b>0</b>   | 1888.6 | 16 | 0 | <b>0</b>   |
| 1315.5 | 107 | 0 | <b>0</b>   | 1932.7 | 16 | 0 | <b>0</b>   |
| 1972.7 | 106 | 0 | <b>0</b>   | 1259.5 | 16 | 0 | <b>0</b>   |
| 788.3  | 106 | 0 | <b>0</b>   | 1227.5 | 16 | 1 | <b>6.2</b> |
| 1341.5 | 106 | 0 | <b>0</b>   | 1606.5 | 16 | 0 | <b>0</b>   |
| 1021.4 | 105 | 0 | <b>0</b>   | 1630.5 | 16 | 0 | <b>0</b>   |
| 1592.6 | 104 | 0 | <b>0</b>   | 2253.7 | 16 | 0 | <b>0</b>   |
| 1430.6 | 104 | 0 | <b>0</b>   | 1766.5 | 16 | 0 | <b>0</b>   |
| 802.3  | 103 | 0 | <b>0</b>   | 1754.6 | 15 | 0 | <b>0</b>   |
| 787.3  | 101 | 0 | <b>0</b>   | 1402.5 | 15 | 1 | <b>6.7</b> |
| 390.1  | 100 | 0 | <b>0</b>   | 2295.7 | 15 | 0 | <b>0</b>   |
| 1225.4 | 98  | 0 | <b>0</b>   | 1396.5 | 15 | 0 | <b>0</b>   |
| 310.1  | 98  | 0 | <b>0</b>   | 1833.6 | 15 | 0 | <b>0</b>   |
| 640.2  | 93  | 0 | <b>0</b>   | 1239.4 | 15 | 0 | <b>0</b>   |
| 757.3  | 92  | 0 | <b>0</b>   | 575.2  | 15 | 0 | <b>0</b>   |
| 997.4  | 92  | 1 | <b>1.1</b> | 1809.6 | 15 | 0 | <b>0</b>   |
| 1912.6 | 92  | 0 | <b>0</b>   | 1101.3 | 15 | 0 | <b>0</b>   |
| 1868.7 | 91  | 0 | <b>0</b>   | 2067.6 | 15 | 0 | <b>0</b>   |
| 1751.6 | 90  | 0 | <b>0</b>   | 1397.5 | 15 | 0 | <b>0</b>   |
| 892.2  | 90  | 0 | <b>0</b>   | 2272.8 | 15 | 0 | <b>0</b>   |
| 1770.7 | 89  | 1 | <b>1.1</b> | 1638.5 | 14 | 0 | <b>0</b>   |
| 1150.4 | 88  | 0 | <b>0</b>   | 1567.6 | 14 | 0 | <b>0</b>   |
| 649.2  | 88  | 2 | <b>2.3</b> | 1677.6 | 14 | 0 | <b>0</b>   |
| 496.2  | 88  | 0 | <b>0</b>   | 2093.7 | 14 | 0 | <b>0</b>   |
| 1077.3 | 87  | 0 | <b>0</b>   | 1548.6 | 14 | 0 | <b>0</b>   |
| 673.2  | 87  | 0 | <b>0</b>   | 1786.6 | 14 | 0 | <b>0</b>   |
| 939.3  | 87  | 0 | <b>0</b>   | 1849.6 | 14 | 0 | <b>0</b>   |
| 1128.4 | 84  | 0 | <b>0</b>   | 1429.5 | 14 | 0 | <b>0</b>   |
| 779.2  | 84  | 2 | <b>2.4</b> | 1273.4 | 14 | 0 | <b>0</b>   |
| 350.1  | 84  | 0 | <b>0</b>   | 1745.5 | 14 | 0 | <b>0</b>   |
| 1314.5 | 83  | 0 | <b>0</b>   | 1703.6 | 14 | 0 | <b>0</b>   |
| 1608.6 | 81  | 0 | <b>0</b>   | 2094.7 | 14 | 1 | <b>7.1</b> |
| 1906.6 | 81  | 0 | <b>0</b>   | 2271.8 | 14 | 0 | <b>0</b>   |
| 1078.3 | 80  | 0 | <b>0</b>   | 1103.3 | 14 | 0 | <b>0</b>   |
| 1054.4 | 80  | 0 | <b>0</b>   | 2122.6 | 14 | 0 | <b>0</b>   |
| 283.1  | 79  | 0 | <b>0</b>   | 2252.7 | 14 | 0 | <b>0</b>   |
| 1243.5 | 79  | 0 | <b>0</b>   | 1532.5 | 14 | 0 | <b>0</b>   |
| 1065.4 | 78  | 0 | <b>0</b>   | 2784   | 14 | 0 | <b>0</b>   |
| 1987.7 | 78  | 0 | <b>0</b>   | 1566.6 | 13 | 0 | <b>0</b>   |
| 893.3  | 77  | 0 | <b>0</b>   | 1516.6 | 13 | 0 | <b>0</b>   |
| 1624.6 | 76  | 0 | <b>0</b>   | 2255.7 | 13 | 0 | <b>0</b>   |
| 813.4  | 75  | 0 | <b>0</b>   | 1475.5 | 13 | 0 | <b>0</b>   |
| 2213.7 | 75  | 0 | <b>0</b>   | 1784.6 | 13 | 0 | <b>0</b>   |

|        |    |   |     |        |    |   |   |
|--------|----|---|-----|--------|----|---|---|
| 1867.7 | 73 | 0 | 0   | 1548.5 | 13 | 0 | 0 |
| 641.3  | 72 | 0 | 0   | 820.3  | 13 | 0 | 0 |
| 1304.4 | 72 | 0 | 0   | 2514.9 | 13 | 0 | 0 |
| 1017.4 | 71 | 0 | 0   | 2394.9 | 13 | 0 | 0 |
| 610.3  | 70 | 0 | 0   | 2045.7 | 13 | 0 | 0 |
| 1768.6 | 69 | 1 | 1.4 | 2068.7 | 13 | 0 | 0 |
| 1288.4 | 69 | 0 | 0   | 1886.5 | 13 | 0 | 0 |
| 1752.7 | 68 | 0 | 0   | 1852.7 | 12 | 0 | 0 |
| 1622.6 | 68 | 0 | 0   | 1210.5 | 12 | 0 | 0 |
| 528.2  | 66 | 0 | 0   | 958.3  | 12 | 0 | 0 |
| 1039.4 | 66 | 5 | 7.6 | 1785.6 | 12 | 0 | 0 |
| 1706.6 | 66 | 0 | 0   | 1405.5 | 12 | 0 | 0 |
| 657.2  | 66 | 0 | 0   | 1515.6 | 12 | 0 | 0 |
| 1911.6 | 65 | 0 | 0   | 1393.4 | 12 | 0 | 0 |
| 2498.9 | 64 | 0 | 0   | 1526.6 | 12 | 0 | 0 |
| 1038.4 | 64 | 0 | 0   | 1678.6 | 12 | 0 | 0 |
| 1305.4 | 64 | 0 | 0   | 1450.5 | 12 | 0 | 0 |
| 650.2  | 63 | 0 | 0   | 2164.8 | 12 | 0 | 0 |
| 917.4  | 63 | 0 | 0   | 1944.7 | 12 | 0 | 0 |
| 1169.5 | 62 | 0 | 0   | 1886.6 | 12 | 0 | 0 |
| 576.1  | 62 | 0 | 0   | 1931.7 | 12 | 0 | 0 |
| 2556.9 | 62 | 0 | 0   | 1573.6 | 12 | 0 | 0 |
| 835.3  | 61 | 0 | 0   | 1834.6 | 12 | 0 | 0 |
| 878.3  | 61 | 0 | 0   | 941.3  | 12 | 0 | 0 |
| 804.3  | 61 | 0 | 0   | 1435.4 | 12 | 0 | 0 |
| 894.3  | 61 | 0 | 0   | 2044.7 | 12 | 0 | 0 |
| 2190.8 | 61 | 0 | 0   | 1230.3 | 12 | 0 | 0 |
| 1151.4 | 60 | 0 | 0   | 1832.5 | 12 | 0 | 0 |
| 309.1  | 60 | 0 | 0   | 2043.7 | 12 | 0 | 0 |
| 1167.4 | 60 | 1 | 1.7 | 900.3  | 11 | 0 | 0 |
| 998.3  | 59 | 5 | 8.5 | 1458.4 | 11 | 0 | 0 |
| 1905.6 | 59 | 0 | 0   | 1729.6 | 11 | 0 | 0 |
| 884.2  | 59 | 0 | 0   | 1069.3 | 11 | 0 | 0 |
| 1362.5 | 58 | 3 | 5.2 | 2293.8 | 11 | 0 | 0 |
| 989.4  | 58 | 0 | 0   | 486.1  | 11 | 0 | 0 |
| 976.3  | 58 | 0 | 0   | 1864.6 | 11 | 0 | 0 |
| 430.1  | 58 | 0 | 0   | 1758.5 | 11 | 0 | 0 |
| 1022.3 | 58 | 0 | 0   | 2141.7 | 11 | 0 | 0 |
| 1015.4 | 57 | 0 | 0   | 1071.3 | 11 | 0 | 0 |
| 1704.7 | 55 | 0 | 0   | 1599.5 | 11 | 0 | 0 |
| 2030.8 | 55 | 0 | 0   | 1433.4 | 11 | 0 | 0 |
| 738.1  | 54 | 0 | 0   | 1272.4 | 11 | 0 | 0 |
| 1705.6 | 54 | 0 | 0   | 1947.7 | 11 | 0 | 0 |



|        |    |   |     |        |    |   |   |
|--------|----|---|-----|--------|----|---|---|
| 919.3  | 53 | 0 | 0   | 1126.3 | 11 | 0 | 0 |
| 898.2  | 53 | 0 | 0   | 1184.5 | 11 | 0 | 0 |
| 1534.5 | 53 | 0 | 0   | 2432.8 | 11 | 0 | 0 |
| 861.3  | 53 | 0 | 0   | 2189.8 | 11 | 0 | 0 |
| 2703   | 53 | 0 | 0   | 2473.8 | 11 | 0 | 0 |
| 1477.5 | 53 | 0 | 0   | 942.4  | 10 | 0 | 0 |
| 1380.5 | 52 | 0 | 0   | 1532.6 | 10 | 0 | 0 |
| 1046.4 | 52 | 0 | 0   | 1613.5 | 10 | 0 | 0 |
| 388.1  | 52 | 0 | 0   | 2010.6 | 10 | 0 | 0 |
| 1168.4 | 52 | 0 | 0   | 2012.6 | 10 | 0 | 0 |
| 658.3  | 52 | 0 | 0   | 1549.5 | 10 | 0 | 0 |
| 1403.5 | 52 | 0 | 0   | 1865.6 | 10 | 0 | 0 |
| 1363.5 | 51 | 0 | 0   | 2173.7 | 10 | 0 | 0 |
| 1518.6 | 50 | 0 | 0   | 1484.4 | 10 | 0 | 0 |
| 756.3  | 50 | 0 | 0   | 1265.4 | 10 | 0 | 0 |
| 956.2  | 50 | 0 | 0   | 1290.4 | 10 | 0 | 0 |
| 778.3  | 50 | 0 | 0   | 1458.5 | 10 | 0 | 0 |
| 1590.6 | 49 | 0 | 0   | 1118.3 | 10 | 0 | 0 |
| 1006.4 | 49 | 0 | 0   | 2028.7 | 10 | 0 | 0 |
| 226    | 49 | 0 | 0   | 1533.6 | 10 | 0 | 0 |
| 1145.4 | 48 | 1 | 2.1 | 2269.8 | 10 | 0 | 0 |
| 1218.5 | 47 | 0 | 0   | 2251.7 | 10 | 0 | 0 |
| 1282.5 | 47 | 0 | 0   | 1565.6 | 10 | 0 | 0 |
| 1201.4 | 47 | 2 | 4.3 | 1621.5 | 10 | 0 | 0 |
| 795.2  | 47 | 0 | 0   | 1247.4 | 10 | 0 | 0 |
| 1517.5 | 46 | 0 | 0   | 1159.4 | 9  | 0 | 0 |
| 1969.7 | 46 | 0 | 0   | 2069.7 | 9  | 0 | 0 |
| 754.2  | 46 | 1 | 2.2 | 2052.6 | 9  | 0 | 0 |
| 1445.6 | 46 | 0 | 0   | 2140.7 | 9  | 0 | 0 |
| 818.2  | 45 | 0 | 0   | 1986.7 | 9  | 0 | 0 |
| 2117.8 | 45 | 0 | 0   | 1185.4 | 9  | 0 | 0 |
| 1356.5 | 45 | 0 | 0   | 1597.5 | 9  | 0 | 0 |
| 1355.5 | 45 | 0 | 0   | 487.1  | 9  | 0 | 0 |
| 699.3  | 45 | 0 | 0   | 1539.4 | 9  | 0 | 0 |
| 999.3  | 45 | 0 | 0   | 2142.7 | 9  | 0 | 0 |
| 1013.4 | 45 | 0 | 0   | 1250.4 | 9  | 0 | 0 |
| 990.4  | 45 | 0 | 0   | 1582.5 | 9  | 0 | 0 |
| 1647.6 | 45 | 0 | 0   | 1916.7 | 9  | 0 | 0 |
| 1202.4 | 45 | 0 | 0   | 2434.8 | 9  | 0 | 0 |
| 1056.3 | 44 | 0 | 0   | 1583.6 | 9  | 0 | 0 |
| 1024.4 | 44 | 0 | 0   | 1612.5 | 9  | 0 | 0 |
| 1226.4 | 44 | 0 | 0   | 1938.7 | 9  | 0 | 0 |
| 1649.6 | 44 | 0 | 0   | 1469.5 | 9  | 0 | 0 |

|        |    |   |            |        |   |   |             |
|--------|----|---|------------|--------|---|---|-------------|
| 284.1  | 43 | 0 | <b>0</b>   | 2165.7 | 8 | 0 | <b>0</b>    |
| 1727.6 | 43 | 1 | <b>2.3</b> | 2084.8 | 8 | 0 | <b>0</b>    |
| 1376.5 | 43 | 0 | <b>0</b>   | 2100.7 | 8 | 0 | <b>0</b>    |
| 285    | 43 | 0 | <b>0</b>   | 1824.7 | 8 | 0 | <b>0</b>    |
| 2029.7 | 42 | 0 | <b>0</b>   | 2019.7 | 8 | 0 | <b>0</b>    |
| 796.3  | 42 | 0 | <b>0</b>   | 1337.4 | 8 | 0 | <b>0</b>    |
| 1442.5 | 42 | 0 | <b>0</b>   | 1614.6 | 8 | 0 | <b>0</b>    |
| 1866.7 | 42 | 0 | <b>0</b>   | 1766.6 | 8 | 0 | <b>0</b>    |
| 1387.5 | 41 | 0 | <b>0</b>   | 2042.7 | 8 | 0 | <b>0</b>    |
| 851.3  | 41 | 0 | <b>0</b>   | 1081.4 | 8 | 0 | <b>0</b>    |
| 1372.5 | 41 | 0 | <b>0</b>   | 2636.9 | 8 | 0 | <b>0</b>    |
| 882.3  | 41 | 0 | <b>0</b>   | 1743.5 | 8 | 0 | <b>0</b>    |
| 674.2  | 41 | 2 | <b>4.9</b> | 1557.6 | 7 | 0 | <b>0</b>    |
| 1144.4 | 40 | 0 | <b>0</b>   | 1281.4 | 7 | 1 | <b>14.3</b> |
| 1576.6 | 40 | 0 | <b>0</b>   | 2110.7 | 7 | 0 | <b>0</b>    |
| 148.1  | 40 | 0 | <b>0</b>   | 899.2  | 7 | 0 | <b>0</b>    |
| 1379.5 | 40 | 1 | <b>2.5</b> | 923.3  | 7 | 0 | <b>0</b>    |
| 1555.5 | 40 | 0 | <b>0</b>   | 1525.5 | 7 | 0 | <b>0</b>    |
| 675.3  | 39 | 0 | <b>0</b>   | 1353.5 | 7 | 0 | <b>0</b>    |
| 1193.5 | 39 | 0 | <b>0</b>   | 1589.5 | 7 | 0 | <b>0</b>    |
| 1589.6 | 39 | 0 | <b>0</b>   | 1672.6 | 7 | 0 | <b>0</b>    |
| 431.1  | 39 | 0 | <b>0</b>   | 2020.7 | 7 | 0 | <b>0</b>    |
| 593.2  | 39 | 0 | <b>0</b>   | 1604.5 | 7 | 0 | <b>0</b>    |
| 1476.5 | 39 | 0 | <b>0</b>   | 1671.6 | 7 | 0 | <b>0</b>    |
| 1127.4 | 39 | 1 | <b>2.6</b> | 931.3  | 7 | 0 | <b>0</b>    |
| 814.4  | 39 | 0 | <b>0</b>   | 1452.4 | 7 | 0 | <b>0</b>    |
| 883.2  | 39 | 0 | <b>0</b>   | 867.2  | 7 | 0 | <b>0</b>    |
| 1249.4 | 39 | 1 | <b>2.6</b> | 2050.6 | 7 | 0 | <b>0</b>    |
| 2118.8 | 38 | 0 | <b>0</b>   | 1143.4 | 7 | 0 | <b>0</b>    |
| 1086.3 | 38 | 0 | <b>0</b>   | 1453.5 | 7 | 0 | <b>0</b>    |
| 853.3  | 38 | 0 | <b>0</b>   | 2049.6 | 6 | 0 | <b>0</b>    |
| 770.2  | 38 | 0 | <b>0</b>   | 1468.5 | 6 | 0 | <b>0</b>    |
| 1595.4 | 38 | 1 | <b>2.6</b> | 1394.4 | 6 | 0 | <b>0</b>    |
| 1971.7 | 37 | 0 | <b>0</b>   | 2125.7 | 6 | 0 | <b>0</b>    |
| 1519.6 | 37 | 0 | <b>0</b>   | 2011.6 | 6 | 0 | <b>0</b>    |
| 2119.8 | 37 | 0 | <b>0</b>   | 1421.4 | 6 | 0 | <b>0</b>    |
| 843.3  | 37 | 0 | <b>0</b>   | 1142.4 | 6 | 0 | <b>0</b>    |
| 1062.4 | 37 | 0 | <b>0</b>   | 1743.6 | 6 | 0 | <b>0</b>    |
| 592.2  | 37 | 0 | <b>0</b>   | 1993.6 | 6 | 0 | <b>0</b>    |
| 1507.5 | 37 | 0 | <b>0</b>   | 1550.6 | 6 | 0 | <b>0</b>    |
| 1386.5 | 36 | 0 | <b>0</b>   | 1485.4 | 6 | 0 | <b>0</b>    |
| 1309.5 | 36 | 0 | <b>0</b>   | 1940.7 | 6 | 0 | <b>0</b>    |
| 1194.5 | 36 | 0 | <b>0</b>   | 2163.7 | 6 | 0 | <b>0</b>    |

|        |    |   |     |        |   |   |    |
|--------|----|---|-----|--------|---|---|----|
| 1753.7 | 36 | 0 | 0   | 2062.8 | 6 | 0 | 0  |
| 1913.6 | 36 | 0 | 0   | 1946.6 | 6 | 0 | 0  |
| 1014.3 | 36 | 0 | 0   | 2254.8 | 5 | 0 | 0  |
| 1296.4 | 35 | 0 | 0   | 1525.6 | 5 | 0 | 0  |
| 1767.5 | 35 | 0 | 0   | 1558.6 | 5 | 0 | 0  |
| 991.4  | 35 | 0 | 0   | 2051.6 | 5 | 0 | 0  |
| 1434.4 | 35 | 0 | 0   | 1620.5 | 5 | 0 | 0  |
| 146.1  | 35 | 0 | 0   | 1669.5 | 5 | 0 | 0  |
| 1005.3 | 34 | 0 | 0   | 1639.6 | 5 | 0 | 0  |
| 1283.5 | 34 | 0 | 0   | 1615.5 | 5 | 0 | 0  |
| 529.2  | 34 | 0 | 0   | 1995.6 | 5 | 0 | 0  |
| 607.2  | 34 | 0 | 0   | 932.2  | 5 | 1 | 20 |
| 2352.9 | 34 | 0 | 0   | 2198.8 | 5 | 0 | 0  |
| 777.2  | 34 | 0 | 0   | 2199.8 | 5 | 0 | 0  |
| 1596.5 | 34 | 0 | 0   | 1070.4 | 5 | 0 | 0  |
| 780.2  | 34 | 0 | 0   | 1985.6 | 5 | 0 | 0  |
| 925.3  | 34 | 0 | 0   | 1904.6 | 5 | 0 | 0  |
| 1321.5 | 34 | 0 | 0   | 2197.8 | 5 | 0 | 0  |
| 1451.5 | 33 | 0 | 0   | 1240.3 | 5 | 0 | 0  |
| 1370.5 | 33 | 0 | 0   | 1686.5 | 5 | 0 | 0  |
| 1064.5 | 33 | 0 | 0   | 2635.9 | 5 | 0 | 0  |
| 698.3  | 33 | 0 | 0   | 1581.5 | 5 | 0 | 0  |
| 2175.8 | 33 | 0 | 0   | 2083.7 | 4 | 0 | 0  |
| 1444.4 | 33 | 0 | 0   | 1509.5 | 4 | 0 | 0  |
| 1170.5 | 32 | 0 | 0   | 1338.4 | 4 | 0 | 0  |
| 1637.6 | 32 | 0 | 0   | 1744.6 | 4 | 0 | 0  |
| 2579.9 | 32 | 0 | 0   | 1466.4 | 4 | 0 | 0  |
| 1161.4 | 32 | 0 | 0   | 2109.7 | 4 | 0 | 0  |
| 1016.4 | 32 | 0 | 0   | 2475.8 | 4 | 0 | 0  |
| 1378.5 | 32 | 0 | 0   | 2124.7 | 4 | 0 | 0  |
| 1040.4 | 31 | 0 | 0   | 2270.7 | 4 | 0 | 0  |
| 1970.7 | 31 | 0 | 0   | 2513.8 | 3 | 0 | 0  |
| 697.3  | 31 | 0 | 0   | 2061.8 | 3 | 0 | 0  |
| 1135.3 | 31 | 0 | 0   | 2099.7 | 3 | 0 | 0  |
| 1535.6 | 31 | 0 | 0   | 1474.6 | 3 | 0 | 0  |
| 918.4  | 31 | 0 | 0   | 2060.8 | 3 | 0 | 0  |
| 924.3  | 31 | 0 | 0   | 1542.6 | 3 | 0 | 0  |
| 1023.4 | 31 | 0 | 0   | 1467.5 | 3 | 0 | 0  |
| 1104.3 | 31 | 2 | 6.5 | 1654.6 | 3 | 0 | 0  |
| 1446.6 | 31 | 0 | 0   | 1605.4 | 3 | 0 | 0  |
| 1427.5 | 30 | 0 | 0   | 1093.3 | 3 | 0 | 0  |
| 1622.4 | 30 | 0 | 0   | 2123.7 | 3 | 0 | 0  |
| 868.3  | 30 | 0 | 0   | 1670.6 | 3 | 0 | 0  |

|        |    |   |          |        |   |   |          |
|--------|----|---|----------|--------|---|---|----------|
| 862.3  | 30 | 0 | <b>0</b> | 1436.5 | 3 | 0 | <b>0</b> |
| 1257.5 | 30 | 0 | <b>0</b> | 1263.4 | 3 | 0 | <b>0</b> |
| 1420.5 | 30 | 0 | <b>0</b> | 2512.8 | 3 | 0 | <b>0</b> |
| 1591.6 | 30 | 0 | <b>0</b> | 2783   | 3 | 0 | <b>0</b> |
| 1728.6 | 30 | 0 | <b>0</b> | 1264.4 | 3 | 0 | <b>0</b> |
| 1598.6 | 30 | 0 | <b>0</b> | 1759.6 | 2 | 0 | <b>0</b> |
| 1808.7 | 30 | 0 | <b>0</b> | 1939.7 | 2 | 0 | <b>0</b> |
| 1648.6 | 30 | 0 | <b>0</b> | 1395.4 | 2 | 0 | <b>0</b> |
| 1914.7 | 30 | 0 | <b>0</b> | 1653.5 | 2 | 0 | <b>0</b> |
| 1119.3 | 30 | 0 | <b>0</b> | 1583.5 | 2 | 0 | <b>0</b> |
| 1388.5 | 30 | 0 | <b>0</b> | 2474.8 | 2 | 0 | <b>0</b> |
| 1063.4 | 29 | 0 | <b>0</b> | 2433.8 | 2 | 0 | <b>0</b> |
| 1915.8 | 29 | 0 | <b>0</b> | 1453.4 | 1 | 0 | <b>0</b> |
| 1200.4 | 29 | 0 | <b>0</b> | 2098.7 | 1 | 0 | <b>0</b> |
| 1306.4 | 29 | 0 | <b>0</b> | 2108.6 | 1 | 0 | <b>0</b> |
| 1208.5 | 29 | 0 | <b>0</b> | 1945.6 | 1 | 0 | <b>0</b> |
|        |    |   |          | 2781.9 | 1 | 0 | <b>0</b> |
